# Supplementary material
Source: HighWire-hosted journal article supplement (https://bmjopen.bmj.com/content/11/9/e048324)
Supplement: inline-supplementary-material-1 [file inline-supplementary-material-1.pdf]

## Searching strategy:

((((((((((NLR OR neutrophil to lymphocyte ratio) OR neutrophil-to-lymphocyte ratio) OR neutrophillymphocyte ratio) OR neutrophil lymphocyte ratio) OR (((PLR OR platelet lymphocyte ratio) OR plateletlymphocyte ratio) OR platelet to lymphocyte ratio) OR platelet-to-lymphocyte ratio) OR platelet lymphocyte ratio)) OR (((LMR OR lymphocyte monocyte ratio) OR lymphocytemonocyte ratio) OR lymphocyte to monocyte ratio) OR lymphocyte-to-monocyte ratio) OR lymphocyte monocyte ratio)) OR (((SII OR Systemic Immune-Inflammation Index) OR Systemic Immune Inflammation Index) OR Systemic Inflammation Index) OR Systemic Immune-Inflammation Indices)) OR (PNI OR Prognostic nutritional index)) OR (((GPS OR Glasgow Outcome Scale) OR GOS) OR Glasgow Prognostic score)) OR (mGPS OR modified Glasgow Prognostic score)) AND (((ESCC OR esophageal neoplasm) OR esophageal cancer) OR esophageal carcinoma) OR esophageal squamous cell carcinoma))
