# Supplementary material
Source: HighWire-hosted journal article supplement (https://bmjopen.bmj.com/content/11/9/e048324)
Supplement: inline-supplementary-material-2 [file inline-supplementary-material-2.pdf]

**Table 1. The characteristics of the studies included.**

| Study                                    | Ethnicity (country) | Sample size | Gender (M/F) | Age                                      | Stage     | NLR cutoff | PLR cutoff | LMR cutoff | PNI cutoff | SII cutoff | GPS cutoff | mGPS cutoff | CAR cutoff | Follow-up (months) | Treatment | Outcome | pathology          | TP /FP /FN /TN (OS)                                                                   |
|------------------------------------------|---------------------|-------------|--------------|------------------------------------------|-----------|------------|------------|------------|------------|------------|------------|-------------|------------|--------------------|-----------|---------|--------------------|---------------------------------------------------------------------------------------|
| Wang L et al. (2017) <sup>[1]</sup>      | China               | 280         | 233/47       | 64.071±7.412                             | 0-IV      | 2          | 159        | 5.3        | NR         | 560        | NR         | NR          | NR         | 36                 | surgery   | OS/DFS  | SCC                | SII:81 32 53 114                                                                      |
| Feng JF et al. (2017) <sup>[2]</sup>     | China               | 298         | 260/38       | NR                                       | I-III     | 5          | 150        | NR         | NR         | 410        | NR         | NR          | NR         | NR                 | surgery   | CSS     | SCC                | SII:165 52 39 42                                                                      |
| Nakatani M et al. (2017) <sup>[3]</sup>  | Japan               | 66          | 56/10        | 64.7 ± 6.1                               | II-III    | NR         | NR         | NR         | 45         | NR         | NR         | NR          | NR         | 31.9               | surgery   | OS/RFS  | SCC                | NR                                                                                    |
| Kubo N et al. (2017) <sup>[4]</sup>      | Japan               | 202         | 162/40       | 63.73 ± 7.93                             | I-IV      | NR         | NR         | NR         | 44         | NR         | NR         | NR          | NR         | 47.1               | surgery   | OS/RFS  | SCC                | NR                                                                                    |
| Hirahara N et al. (2018) <sup>[5]</sup>  | Japan               | 169         | 150/19       | PNI<49.2: 67.1±8.2<br>PNI≥49.2: 65.4±8.0 | Ia-IIIc   | NR         | NR         | NR         | 49.2       | NR         | NR         | NR          | NR         | NR                 | surgery   | OS/CSS  | SCC                | NR                                                                                    |
| Dai YQ et al. (2019) <sup>[6]</sup>      | China               | 106         | 79/27        | <65:82;<br>≥65:24                        | T1-4/N0-1 | 2.1        | 104.1      | 3.45       | 48.15      | 305.6      | NR         | NR          | NR         | 19(2–190)          | CRT       | OS      | SCC                | PNI: 43 7 33 23                                                                       |
| Ishibashi Y et al. (2018) <sup>[7]</sup> | Japan               | 143         | 121/22       | 70.6 ± 8.4(43–90)                        | I-IV      | 3          | 135        | NR         | NR         | 650        | NR         | NR          | 0.085      | NR                 | surgery   | OS/CSS  | SCC/ADC<br>/Others | SII: 39 17 46 41<br>NLR: 42 14 45<br>42<br>PLR: 66 28 24<br>25<br>CAR: 60 15 27<br>41 |
| Zhang HD et al. (2018) <sup>[8]</sup>    | China               | 655         | 537/118      | 61(27–88)                                | 0-III     | 1.87       | 140.09     | NR         | 52.28      | 387.65     | NR         | NR          | NR         | 36.0(3–144)        | surgery   | OS      | SCC                | PLR: 148 81 236<br>190<br>SII: 259 146 125<br>125<br>PNI: 264 137<br>138 116          |
| Yang YC et al. (2018) <sup>[9]</sup>     | China               | 515         | 418/97       | 61(33–92)                                | I-III     | 1.2        | 130        | NR         | 57         | NR         | NR         | NR          | NR         | 35(2–106)          | surgery   | OS      | SCC                | PLR: 143 67 168<br>137<br>PNI: 217 117 90<br>91                                       |
| Wu CC et al. (2018) <sup>[10]</sup>      | China               | 126         | 122/4        | 58(37–80)                                | IIIa-IIIc | 2.5        | 103        | NR         | NR         | NR         | NR         | 0/1,2       | 0.95       | NR                 | mixed     | OS      | SCC                | CAR: 57 1 52 17<br>mGPS: 77 2 34<br>15                                                |
| Wei XL et al. (2015) <sup>[11]</sup>     | China               | 423         | 341/82       | 58(24–88)                                | I-IV      | 1.835      | 163.8      | NR         | 49.05      | NR         | NR         | 0,1,2       | 0.095      | 35.7(0.6–95.6)     | surgery   | OS      | SCC                | CAR: 90 57 119<br>157                                                                 |
| Geng YT et al. (2016) <sup>[12]</sup>    | China               | 916         | 696/220      | 60.0(37–84)                              | 0-III     | 1.7        | 120        | 3.57       | NR         | 307        | NR         | NR          | NR         | 39(3–146)          | surgery   | OS      | SCC                | SII: 279 227 113<br>140<br>LMR: 239 181                                               |

|                                          |       |     |        |                     |           |       |        |      |    |           |       |       |       |                      |         |        |     |                 |                 |
|------------------------------------------|-------|-----|--------|---------------------|-----------|-------|--------|------|----|-----------|-------|-------|-------|----------------------|---------|--------|-----|-----------------|-----------------|
|                                          |       |     |        |                     |           |       |        |      |    |           |       |       |       |                      |         |        |     |                 | 258 238         |
|                                          |       |     |        |                     |           |       |        |      |    |           |       |       |       |                      |         |        |     |                 | PLR: 275 183    |
|                                          |       |     |        |                     |           |       |        |      |    |           |       |       |       |                      |         |        |     |                 | 238 220         |
| Gao YB et al. (2019) <sup>[13]</sup>     | China | 468 | 376/92 | 59.5(36–81)         | I-III     | 2.27  | 117.05 | 5.26 | NR | 479.72    | NR    | NR    | NR    | 49.1±32.6(3.2–114.5) | surgery | OS/DFS | SCC | SII: 93 50 162  |                 |
|                                          |       |     |        |                     |           |       |        |      |    |           |       |       |       |                      |         |        |     |                 | 163             |
|                                          |       |     |        |                     |           |       |        |      |    |           |       |       |       |                      |         |        |     |                 | PLR: 93 60 164  |
|                                          |       |     |        |                     |           |       |        |      |    |           |       |       |       |                      |         |        |     |                 | 151             |
|                                          |       |     |        |                     |           |       |        |      |    |           |       |       |       |                      |         |        |     |                 | LMR: 96 69 155  |
|                                          |       |     |        |                     |           |       |        |      |    |           |       |       |       |                      |         |        |     |                 | 148             |
| Liu JS et al. (2015) <sup>[14]</sup>     | China | 326 | 283/43 | 59.2±7.9(38-80)     | T1-4/N0-3 | 3.45  | 166    | 2.3  | NR | NR        | 0/1,2 | NR    | NR    | 45                   | surgery | CSS    | SCC | GPS: 108 31 95  |                 |
|                                          |       |     |        |                     |           |       |        |      |    |           |       |       |       |                      |         |        |     |                 | 92              |
|                                          |       |     |        |                     |           |       |        |      |    |           |       |       |       |                      |         |        |     |                 | PLR: 114 28 89  |
|                                          |       |     |        |                     |           |       |        |      |    |           |       |       |       |                      |         |        |     |                 | 95              |
|                                          |       |     |        |                     |           |       |        |      |    |           |       |       |       |                      |         |        |     |                 | LMR: 112 36 81  |
|                                          |       |     |        |                     |           |       |        |      |    |           |       |       |       |                      |         |        |     |                 | 87              |
| Hirahara N et al. (2016) <sup>[15]</sup> | Japan | 147 | 132/15 | <70: 46<br>≥70: 101 | Ia-IIIc   | 1.6   | 147    | 4    | NR | NR        | NR    | NR    | NR    | 42(3-111)            | surgery | OS/CSS | SCC | LMR: 59 24 35   |                 |
|                                          |       |     |        |                     |           |       |        |      |    |           |       |       |       |                      |         |        |     |                 | 29              |
|                                          |       |     |        |                     |           |       |        |      |    |           |       |       |       |                      |         |        |     |                 | PLR: 56 23 38   |
|                                          |       |     |        |                     |           |       |        |      |    |           |       |       |       |                      |         |        |     |                 | 30              |
| Han LH et al. (2015) <sup>[16]</sup>     | China | 218 | 177/41 | 60.5(32-84)         | I-III     | 2.6   | 244    | 2.57 | NR | NR        | NR    | NR    | NR    | 38.6(3-71)           | surgery | OS/DFS | SCC | NR              |                 |
| Gao QF et al. (2018) <sup>[17]</sup>     | China | 153 | 128/25 | 61.93±6.72          | 0-III     | 2.1   | 145.9  | 2.3  | NR | NR        | NR    | NR    | NR    | NR                   | surgery | OS     | SCC | NR              |                 |
| Kunkzaki M et al. (2018) <sup>[18]</sup> | Japan | 116 | 98/18  | 66(44-83)           | 0-IV      | 5     | 150    | NR   | 45 | NR        | 0/1,2 | 0/1,2 | 0.042 | NR                   | mixed   | OS     | SCC | CAR: 29 22 29   |                 |
|                                          |       |     |        |                     |           |       |        |      |    |           |       |       |       |                      |         |        |     |                 | 36              |
| Xu XL et al. (2015) <sup>[19]</sup>      | China | 468 | 416/52 | 58                  | I-IIIc    | 2.4   | 147    | NR   | NR | NR        | 0/1,2 | 0/1,2 | 0.5   | 49.9(10.9–88.0)      | surgery | OS     | NR  | CAR: 72 15 216  |                 |
|                                          |       |     |        |                     |           |       |        |      |    |           |       |       |       |                      |         |        |     |                 | 165             |
| Toyokawa T et al. (2016) <sup>[20]</sup> | Japan | 185 | 152/33 | 64(59–70)           | I-IV      | 3.612 | 193    | NR   | NR | NR        | 0/1,2 | NR    | NR    | 81.5(IQR:45.8–112.3) | surgery | OS/RFS | SCC | NR              |                 |
| Li KJ et al. (2019) <sup>[21]</sup>      | China | 204 | 171/33 | 65.8(38-85)         | T1-4/N0-2 | 2.64  | NR     | 3.03 | NR | NR        | NR    | NR    | NR    | 11.5(2.1-77.4)       | CRT     | OS/RFS | SCC | NR              |                 |
| Fu XB et al. (2019) <sup>[22]</sup>      | China | 357 | 279/78 | 57(34-77)           | I-IVa     | 2.27  | NR     | 2.57 | NR | SIS:0/1/2 | NR    | NR    | NR    | 58(1–84)             | surgery | OS     | SCC | NLR: 77 50 100  |                 |
|                                          |       |     |        |                     |           |       |        |      |    |           |       |       |       |                      |         |        |     |                 | 128             |
| Zhang F et al. (2016) <sup>[23]</sup>    | China | 468 | 376/92 | 60(36-81)           | I-III     | 2.5   | 117.07 | NR   | NR | NR        | NR    | NR    | NR    | 49.1±32.6(3.2-14.5)  | surgery | OS/DFS | SCC | NR              |                 |
| Xie X et al. (2016) <sup>[24]</sup>      | China | 317 | 244/73 | 58.1±8.9(34–76)     | I-III     | 2.1   | 103    | NR   | NR | NR        | NR    | NR    | NR    | 46(36–62)            | surgery | DSS    | SCC | NR              |                 |
| Wu YF et al. (2019) <sup>[25]</sup>      | China | 105 | 98/7   | 57.69±8.6(38-81)    | I-III     | 4.35  | NR     | NR   | NR | NR        | NR    | NR    | NR    | 19.5±14.1            | CRT     | OS/PFS | SCC | PLR: 44 9 34 18 |                 |
|                                          |       |     |        |                     |           |       |        |      |    |           |       |       |       |                      |         |        |     |                 | NLR: 45 8 33 19 |
| Feng JF et al.                           | China | 483 | 411/72 | 59.1±8.0(34-80)     | T1-4/N+   | 3.5   | 150    | NR   | NR | NR        | NR    | NR    | NR    | NR                   | surgery | OS     | SCC | NLR:115 63 129  |                 |

|                                                 |         |      |         |                                                       |                 |      |    |       |    |     |          |       |    |                     |         |         |         |                 |                |
|-------------------------------------------------|---------|------|---------|-------------------------------------------------------|-----------------|------|----|-------|----|-----|----------|-------|----|---------------------|---------|---------|---------|-----------------|----------------|
| al. (2014) <sup>[26]</sup>                      |         |      |         |                                                       |                 |      |    |       |    |     |          |       |    |                     |         |         |         |                 | 176            |
|                                                 |         |      |         |                                                       |                 |      |    |       |    |     |          |       |    |                     |         |         |         |                 | PLR: 148 72 96 |
|                                                 |         |      |         |                                                       |                 |      |    |       |    |     |          |       |    |                     |         |         |         |                 | 167            |
| Zhu YM et al. (2017) <sup>[27]</sup>            | China   | 220  | 117/103 | ≤60/>60:124/96                                        | T3N0M0          | NR   | NR | 3.364 | NR | NR  | NR       | NR    | NR | DFS:40.0(34.2–45.8) | mixed   | OS/DFS  | SCC     | LMR: 81 45 51   |                |
|                                                 |         |      |         |                                                       |                 |      |    |       |    |     |          |       |    | OS:53.0(48.0–58.0)  |         |         |         | 43              |                |
| Song Q et al. (2019) <sup>[28]</sup>            | China   | 680  | 582/98  | 61(56-67)                                             | Ia-IIIc         | NR   | NR | 3.17  | NR | NR  | NR       | NR    | NR | NR                  | mixed   | OS/DFS  | SCC     | LMR: 182 161    |                |
|                                                 |         |      |         |                                                       |                 |      |    |       |    |     |          |       |    |                     |         |         |         | 135 202         |                |
| Chen MF et al. (2018) <sup>[29]</sup>           | China   | 1168 | 1113/55 | (<50/50-64/>64):<br>344/609/215                       | ≤T2/T3-T4,N0/N+ | 3    | NR | NR    | NR | NR  | NR       | NR    | NR | NR                  | mixed   | OS/DFS  | SCC     | NLR: 567 77     |                |
|                                                 |         |      |         |                                                       |                 |      |    |       |    |     |          |       |    |                     |         |         |         | 419 105         |                |
| Duan H et al. (2015) <sup>[30]</sup>            | China   | 371  | 276/95  | 57.7±8.9                                              | Ib-IIIc         | 3    | NR | NR    | NR | 410 | NR       | NR    | NR | 66(49-76)           | surgery | CSS/RFS | SCC     | NR              |                |
| Gao GD et al. (2017) <sup>[31]</sup>            | China   | 1281 | 988/293 | Survival/Dead(634/647)<br>57.7±8.9/60.2±27.7          | 0-IV            | 2.86 | NR | NR    | NR | NR  | NR       | NR    | NR | NR                  | mixed   | OS      | SCC     | NR              |                |
| Han FY et al. (2019) <sup>[32]</sup>            | China   | 354  | 267/87  | <60/>=60:100/254                                      | I-IV            | 1.88 | NR | NR    | NR | NR  | NR       | NR    | NR | 26(2-80)            | surgery | OS/DFS  | SCC/ADC | NR              |                |
|                                                 |         |      |         |                                                       |                 |      |    |       |    |     |          |       |    |                     |         |         |         | /Others         |                |
| Hirahara Noriyuki et al. (2018) <sup>[33]</sup> | Japan   | 148  | 132/16  | CONUT 0/1/2-3(48/37/11)<br>61.5±5.4/61.8±5.9/60.4±5.3 | Ia-IIIc         | 3.5  | NR | NR    | NR | NR  | NR       | NR    | NR | NR                  | surgery | CSS     | SCC     | NR              |                |
| Kosumi K et al. (2016) <sup>[34]</sup>          | Japan   | 313  | 248/35  | <65/>=65(118/165)                                     | 0-IV            | 1.94 | NR | NR    | NR | NR  | NR       | NR    | NR | 33.6                | surgery | OS/CSS  | SCC     | NR              |                |
| Lu YJ et al. (2019) <sup>[35]</sup>             | China   | 315  | 259/56  | 59(35-75)                                             | I-IVa           | 3.18 | NR | NR    | NR | NR  | NR       | NR    | NR | NR                  | surgery | OS      | SCC     | NLR: 87 37 107  |                |
|                                                 |         |      |         |                                                       |                 |      |    |       |    |     |          |       |    |                     |         |         |         | 84              |                |
| Nakamura K et al. (2017) <sup>[36]</sup>        | Japan   | 245  | 219/26  | <65/>=65:110/135                                      | T1a-b/N0-3      | 2.42 | NR | NR    | NR | NR  | NR       | NR    | NR | 37.2                | surgery | OS/DFS  | SCC/ADC | NLR: 16 22 16   |                |
|                                                 |         |      |         |                                                       |                 |      |    |       |    |     |          |       |    |                     |         |         |         | /Others         |                |
| Sharaiha RZ et al. (2011) <sup>[37]</sup>       | USA     | 295  | 237/58  | 62.8                                                  | I-IV            | 5    | NR | NR    | NR | NR  | NR       | NR    | NR | 31(13–61)           | surgery | OS/DFS  | SCC/ADC | NR              |                |
|                                                 |         |      |         |                                                       |                 |      |    |       |    |     |          |       |    |                     |         |         |         | /Others         |                |
| Xiao Q et al. (2016) <sup>[38]</sup>            | China   | 121  | 106/15  | 62(30–76)                                             | I-III           | 1.77 | NR | NR    | NR | NR  | NR       | NR    | NR | 28.0(1–102)         | surgery | OS/RFS  | SCC     | NLR: 45 13 37   |                |
|                                                 |         |      |         |                                                       |                 |      |    |       |    |     |          |       |    |                     |         |         |         | 26              |                |
| Zhou XL et al. (2017) <sup>[39]</sup>           | China   | 517  | 407/110 | 65(36–74)                                             | II-IV           | 5    | NR | NR    | NR | NR  | NR       | NR    | NR | 17(2-76)            | CRT     | OS/PFS  | SCC     | NLR: 188 12     |                |
|                                                 |         |      |         |                                                       |                 |      |    |       |    |     |          |       |    |                     |         |         |         | 244 69          |                |
| Arigami T et al. (2015) <sup>[40]</sup>         | Japan   | 238  | 210/28  | 65(37–87)                                             | I-III           | 3    | NR | NR    | NR | NR  | NR       | 0/1,2 | NR | 26(1-182)           | surgery | OS      | SCC     | mGPS: 44 26 54  |                |
|                                                 |         |      |         |                                                       |                 |      |    |       |    |     |          |       |    |                     |         |         |         | 114             |                |
| Lindenmann J et al. (2017) <sup>[41]</sup>      | Austria | 174  | 148/26  | 61.1(22-81)                                           | T0-4/N0-3       | NR   | NR | NR    | NR | NR  | 1-2 vs 0 | NR    | NR | NR                  | mixed   | AC/CSS  | ADC/SCC | GPS: 33 6 41 25 |                |
| Ma QL et al.                                    | China   | 725  | 539/186 | 58(32-80)                                             | TNM I/II/III    | NR   | NR | NR    | NR | NR  | 1-2 vs 0 | NR    | NR | 28                  | surgery | CSS     | SCC     | NR              |                |



|                                            |               |     |                               |                                           |                     |      |        |      |      |    |       |        |           |               |                                    |        | GPS0            | 107 66                                                               |
|--------------------------------------------|---------------|-----|-------------------------------|-------------------------------------------|---------------------|------|--------|------|------|----|-------|--------|-----------|---------------|------------------------------------|--------|-----------------|----------------------------------------------------------------------|
| Okadome K et al. (2018) <sup>[57]</sup>    | Japan         | 337 | 300/37                        | 65.9                                      | I-IV                | NR   | NR     | NR   | 45   | NR | NR    | NR     | NR        | 60            | Surgery                            | OS/CSS | SCC/ADC /Others | PNI: 63 24 62<br>92                                                  |
| Migita K et al. (2018) <sup>[58]</sup>     | Japan         | 137 | 76/16                         | NR                                        | T1-T4/N0-N+         | 2.2  | NR     | NR   | 47   | NR | NR    | NR     | NR        | NR            | mixed                              | OS     | SCC             | NR                                                                   |
| Zhang H et al. (2019) <sup>[59]</sup>      | China         | 266 | 172/94                        | 67(48-87)                                 | I-III               | 3.06 | 145.26 | NR   | NR   | NR | NR    | NR     | 0.13      | NR            | curative RT only or concurrent CRT | OS     | SCC             | NLR: 107 28 68<br>63<br>PLR: 100 33 74<br>59<br>CAR: 104 10 59<br>93 |
| Otowa Y et al. (2017) <sup>[60]</sup>      | Japan         | 149 | 129/20                        | 66.9±8.3                                  | II/III              | NR   | NR     | NR   | NR   | NR | NR    | NR     | 0.030     | NR            | Mixed                              | OS     | SCC             | NR                                                                   |
| Liu XQ et al. (2019) <sup>[61]</sup>       |               |     |                               |                                           |                     |      |        |      |      |    |       |        | 0.15      |               | radical radiotherapy               | OS     |                 | NR                                                                   |
| Shao YJ et al. (2015) <sup>[62]</sup>      | China         | 916 | primary:633<br>validation:283 | Primary:60(37-83)<br>Validation:61(38-84) | I-III               | 1.7  | 120    | 3.57 | NR   | NR | 0/1/2 | 0/1/2  | 0.06/0.12 | 39(3-146.2)   | Surgery                            | OS     | SCC             | NR                                                                   |
| Liu DQ et al. (2016) <sup>[63]</sup>       | China         | 260 | 217/43                        | 59( 39-83)                                | I-IV                | NR   | NR     | NR   | NR   | NR | 0/1/2 | NR     | NR        | 40.5 (2-91)   | surgery                            | OS/DFS | SCC             | NR                                                                   |
| Wang CY et al. (2012) <sup>[64]</sup>      | Taiwan, China | 271 | 261/10                        | NR                                        | I-IV                | NR   | NR     | NR   | NR   | NR | 0/1,2 | NR     | NR        | 30 (5-81)     | mixed                              | OS     | SCC/ADC         | NR                                                                   |
| Feng JF et al. (2014) <sup>[65]</sup>      | China         | 493 | 420/73                        | 59.1(34 to 80)                            | T1-4a/N-+           | NR   | NR     | NR   | NR   | NR | 2/0   | NR     | NR        | 45            | surgery                            | NR     | SCC             | NR                                                                   |
| Lindenmann J et al. (2014) <sup>[66]</sup> | Austria       | 214 | 181/33                        | 67 ± 11.84(21-93)                         | III-IV              | NR   | NR     | NR   | NR   | NR | 0/1/2 | NR     | NR        | NR            | CT+RT                              | NR     | SCC/ADC         | NR                                                                   |
| Matsuda S et al. (2015) <sup>[67]</sup>    | Japan         | 199 | 180/19                        | 62.9 ± 8.29                               | I-IV                | NR   | NR     | NR   | NR   | NR | 0/1/2 | NR     | NR        | 28.5          | mixed                              | OS/DFS | SCC/ADC /Others | NR                                                                   |
| Liu XM et al. (2017) <sup>[68]</sup>       | China         | 162 | 127/35                        | 63 (38-70)                                | II-III              | NR   | NR     | 4.02 | NR   | NR | NR    | NR     | NR        | 23.3 (8-43.7) | mixed                              | OS/PFS | SCC             | LMR: 61 20 43<br>38                                                  |
| Tian R et al. (2016) <sup>[69]</sup>       | China         | 260 | 193/67                        | 59.0 (20.0-87.0)                          | I-III               | NR   | NR     | NR   | NR   | NR | NR    | 0/1,2  | NR        | 46.5          | surgery                            | OS/DFS | SCC             | NR                                                                   |
| Nakamura M et al. (2014) <sup>[70]</sup>   | Japan         | 168 | 135/33                        | 67(47-85)                                 | 0-IV                | NR   | NR     | NR   | NR   | NR | NR    | 0 vs 2 | NR        | 39(5-99)      | mixed                              | NR     | SCC             | NR                                                                   |
| Han LH et al. (2015) <sup>[71]</sup>       | China         | 206 | 165/41                        | 60(32-84)                                 | I-IV/T1-4/N0-3      | NR   | NR     | 2.9  | 45.5 | NR | NR    | NR     | NR        | 39.5(3-71)    | surgery                            | OS/DFS | SCC             | NR                                                                   |
| Miyazaki T et al.                          | Japan         | 192 | 173/19                        | 65.8(42-86)                               | I-IV/T1-4/N0-3/M0-1 | 3.49 | NR     | NR   | 47.7 | NR | NR    | NR     | NR        | 26.5(1-108)   | surgery                            | OS     | NR              | PNI: 31 34 39<br>88                                                  |

---

(2016)<sup>[72]</sup>

---

Abbreviations: OS, overall survival; CSS, cancer-specific survival; DFS, disease-free survival; EC, esophageal carcinoma; NLR, neutrophil-to-lymphocyte ratio; PLR, platelet-to-lymphocyte ratio; LMR, lymphocyte-to-monocyte ratio; CAR, c-reactive protein-to-albumin ratio; SII, systemic inflammation index; PNI, prognostic nutritional index; GPS, Glasgow Prognostic Score; mGPS, modified Glasgow Prognostic Score; TP, true-positive; FP, false-positive; TN, true-negative; FN, false-negative

## Reference

- [1] Wang L, Wang C, Wang JF, Huang XC, Cheng YF. A novel systemic immune-inflammation index predicts survival and quality of life of patients after curative resection for esophageal squamous cell carcinoma. *Journal of Cancer Research and Clinical Oncology*, 2017, 143(10):2077-2086.
- [2] Feng JF, Chen S, Yang X. Systemic immune-inflammation index (SII) is a useful prognostic indicator for patients with squamous cell carcinoma of the esophagus. *Medicine*, 2017, 96(4).
- [3] Nakatani M, Migita K, Matsumoto S, Wakatsuki K, Ito M, Nakade H, Kunishige T, Kitano M, Kanehiro H. Prognostic significance of the prognostic nutritional index in esophageal cancer patients undergoing neoadjuvant chemotherapy. *Diseases of the Esophagus*, 2017, 30(8).
- [4] Kubo N, Ohira M, Tamura T, Sakurai K, Toyokawa T, Tanaka H, Yashiro M, Yamashita Y, Hirakawa K. Prognostic significance of baseline nutritional index for patients with esophageal squamous cell carcinoma after radical esophagectomy. *Esophagus*, 2017, 14(1):84-90.
- [5] Hirahara N, Tajima Y, Fujii Y, Kaji S, Yamamoto T, Hyakudomi R, Taniura T, Miyazaki Y, Kishi T, Kawabata Y. Preoperative Prognostic Nutritional Index Predicts Long-Term Surgical Outcomes in Patients with Esophageal Squamous Cell Carcinoma. *World Journal of Surgery*, 2018, 42(7):2199-2208.
- [6] Dai YQ, Fu XB, Li TT, Yao QW, Su LY, Su HY, Li JC. Long-term impact of prognostic nutritional index in cervical esophageal squamous cell carcinoma patients undergoing definitive radiotherapy. *Annals of Translational Medicine*, 2019, 7(8).
- [7] Ishibashi Y, Tsujimoto H, Hiraki S, Kumano I, Yaguchi Y, Horiguchi H, Nomura S, Ito N, Shinto E, Aosasa S, Yamamoto J, Ueno H. Prognostic Value of Preoperative Systemic Inflammatory Measures in Patients with Esophageal Cancer. *Annals of Surgical Oncology*, 2018, 25(11):3288-3299.
- [8] Zhang HD, Shang XB, Ren P, Gong L, Ahmed A, Ma Z, Ma R, Wu XX, Xiao XM, Jiang HJ, Tang P, Yu ZT. The predictive value of a preoperative systemic immune-inflammation index and prognostic nutritional index in patients with esophageal squamous cell carcinoma. *Journal of Cellular Physiology*, 2019, 234(2):1794-1802.
- [9] Yang YC, Xu H, Zhou LK, Deng T, Ning T, Liu R, Zhang L, Wang X, Ge SH, Li HL, Ba Y. Platelet to lymphocyte ratio is a predictive marker of prognosis and therapeutic effect of postoperative chemotherapy in non-metastatic esophageal squamous cell carcinoma. *Clinica Chimica Acta*, 2018, 479:160-165.
- [10] Wu CC, Li SH, Lu HI, Lo CM, Wang YM, Chou SY, Chen YH. Inflammation-based prognostic scores predict the prognosis of locally advanced cervical esophageal squamous cell carcinoma patients receiving curative concurrent chemoradiotherapy: a propensity score-matched analysis. *Peerj*, 2018, 6.
- [11] Wei XL, Wang FH, Zhang DS, Qiu MZ, Ren C, Jin Y, Zhou YX, Wang DS, He MM, Bai L, Wang F, Luo HY, Li YH, Xu RH. A novel inflammation-based prognostic score in esophageal squamous cell carcinoma: the C-reactive protein/albumin ratio. *Bmc Cancer*, 2015, 15.
- [12] Geng YT, Shao YJ, Zhu DX, Zheng X, Zhou Q, Zhou WJ, Ni XF, Wu CP, Jiang JT. Systemic Immune-Inflammation Index Predicts Prognosis of Patients with Esophageal Squamous Cell Carcinoma: A Propensity Score-matched Analysis. *Scientific Reports*, 2016, 6.
- [13] Gao YB, Guo W, Cai SH, Zhang F, Shao F, Zhang GC, Liu TJ, Tan FW, Li N, Xue Q, Gao SG, He J. Systemic immune-inflammation index (SII) is useful to predict survival outcomes in patients with surgically resected esophageal squamous cell carcinoma. *Journal of Cancer*, 2019, 10(14):3188-3196.
- [14] Liu JS, Huang Y, Yang X, Feng JF. A nomogram to predict prognostic values of various inflammatory biomarkers in patients with esophageal squamous cell carcinoma. *American Journal of Cancer Research*, 2015, 5(7):2180-2189.
- [15] Hirahara N, Matsubara T, Kawahara D, Nakada S, Ishibashi S, Tajima Y. Prognostic significance of preoperative inflammatory response biomarkers in patients undergoing curative thoracoscopic esophagectomy for esophageal squamous cell carcinoma. *Ejso*, 2016, 43(2):493-501.
- [16] Han LH, Jia YB, Song QX, Wang JB, Wang NN, Cheng YF. Prognostic significance of preoperative lymphocyte-monocyte ratio in patients with resectable esophageal squamous cell carcinoma. *Asian Pac J Cancer Prev*, 2015, 16(6):2245-2250.
- [17] Gao QF, Qiu JC, Huang XH, Xu YM, Li SQ, Sun F, Zhang J, Yang WM, Min QH, Jiang YH, Chen QG, Zhang L, Wang XZ, Ying HQ. The predictive and prognostic role of a novel ADS score in esophageal squamous cell carcinoma patients undergoing esophagectomy. *Cancer Cell International*, 2018, 18.
- [18] Kunizaki M, Tominaga T, Wakata K, Miyazaki T, Matsumoto K, Sumida Y, Hidaka S, Yamasaki T, Yasutake T, Sawai T, Hamamoto R, Nanashima A, Nagayasu T. Clinical significance of the C-reactive protein-to-albumin ratio for the prognosis of patients with esophageal squamous cell carcinoma. *Mol Clin Oncol*, 2018, 8(2):370-374.
- [19] Xu XL, Yu HQ, Hu W, Song Q, Mao WM. A Novel Inflammation-Based Prognostic Score, the C-Reactive Protein/Albumin Ratio Predicts the Prognosis of Patients with Operable Esophageal Squamous Cell Carcinoma. *Plos One*, 2015, 10(9).
- [20] Toyokawa T, Kubo N, Tamura T, Sakurai K, Amano R, Tanaka H, Muguruma K, Yashiro M, Hirakawa K, Ohira M. The pretreatment Controlling Nutritional Status (CONUT) score is an independent prognostic factor in patients with resectable thoracic

- esophageal squamous cell carcinoma: results from a retrospective study. *Bmc Cancer*, 2016, 16.
- [21] Li KJ, Xia XF, Su M, Zhang H, Chen WH, Zou CL. Predictive value of lymphocyte-to-monocyte ratio (LMR) and neutrophil-to-lymphocyte ratio (NLR) in patients with oesophageal cancer undergoing concurrent chemoradiotherapy. *Bmc Cancer*, 2019, 19(1).
- [22] Fu XB, Li TT, Dai YQ, Li JC. Preoperative systemic inflammation score (SIS) is superior to neutrophil to lymphocyte ratio (NLR) as a predicting indicator in patients with esophageal squamous cell carcinoma. *Bmc Cancer*, 2019, 19.
- [23] Zhang F, Chen ZL, Wang P, Hu XD, Gao YB, He J. Combination of platelet count and mean platelet volume (COP-MPV) predicts postoperative prognosis in both resectable early and advanced stage esophageal squamous cell cancer patients. *Tumor Biology*, 2016, 37(7):9323-9331.
- [24] Xie X, Luo KJ, Hu Y, Wang JY, Chen J. Prognostic value of preoperative platelet-lymphocyte and neutrophil-lymphocyte ratio in patients undergoing surgery for esophageal squamous cell cancer. *Diseases of the Esophagus*, 2016, 29(1):79-85.
- [25] Wu YF, Chu SC, Chang BS, Cheng YT, Wang TF. Hematologic Markers as Prognostic Factors in Nonmetastatic Esophageal Cancer Patients under Concurrent Chemoradiotherapy. *Biomed Research International*, 2019.
- [26] Feng JF, Huang Y, Chen QX. Preoperative platelet lymphocyte ratio (PLR) is superior to neutrophil lymphocyte ratio (NLR) as a predictive factor in patients with esophageal squamous cell carcinoma. *World Journal of Surgical Oncology*, 2014, 12.
- [27] Zhu YM, Li MH, Bo C, Liu XM, Zhang JB, Li ZX, Zhao F, Kong L, Yu JM. Prognostic significance of the lymphocyte-to-monocyte ratio and the tumor-infiltrating lymphocyte to tumor-associated macrophage ratio in patients with stage T3N0M0 esophageal squamous cell carcinoma. *Cancer Immunology Immunotherapy*, 2017, 66(3):343-354.
- [28] Song Q, Wu JZ, Wang S. Low Preoperative Lymphocyte to Monocyte Ratio Serves as a Worse Prognostic Marker in Patients with Esophageal Squamous Cell Carcinoma Undergoing Curative Tumor Resection. *Journal of Cancer*, 2019, 10(9):2057-2062.
- [29] Chen MF, Chen PT, Kuan FC, Chen WC. The Predictive Value of Pretreatment Neutrophil-To-Lymphocyte Ratio in Esophageal Squamous Cell Carcinoma. *Annals of Surgical Oncology*, 2019, 26(1):190-199.
- [30] Duan H, Zhang X, Wang FX, Cai MY, Ma GW, Yang H, Fu JH, Tan ZH, Meng YQ, Fu XY, Ma QL, Lin P. Prognostic role of neutrophil-lymphocyte ratio in operable esophageal squamous cell carcinoma. *World Journal of Gastroenterology*, 2015, 21(18):5591-5597.
- [31] Gao GD, Sun B, Wang XB, Wang SM. Neutrophil to lymphocyte ratio as prognostic indicator for patients with esophageal squamous cell cancer. *International Journal of Biological Markers*, 2017, 32(4):E409-E414.
- [32] Han FY, Liu YQ, Cheng SQ, Sun ZH, Sheng CC, Sun XY, Shang XM, Tian WJ, Wang XY, Li JM, Liu D, Wang Y, Zhang BC, Ju Y. Diagnosis and survival values of neutrophil-lymphocyte ratio (NLR) and red blood cell distribution width (RDW) in esophageal cancer. *Clinica Chimica Acta*, 2019, 488:150-158.
- [33] Hirahara N, Matsubara T, Hayashi H, Takai K, Nakada S, Tajima Y. Prognostic Importance of Controlling Nutritional Status in Patients Undergoing Curative Thoracoscopic Esophagectomy for Esophageal Cancer. *American Journal of Therapeutics*, 2018, 25(5):E524-E532.
- [34] Kosumi K, Baba Y, Ishimoto T, Harada K, Nakamura K, Ohuchi M, Kiyozumi Y, Izumi D, Tokunaga R, Taki K, Higashi T, Miyata T, Kurashige J, Hiyoshi Y, Iwagami S, Sakamoto Y, Miyamoto Y, Yoshida N, Watanabe M, Baba H. Neutrophil/lymphocyte ratio predicts the prognosis in esophageal squamous cell carcinoma patients. *Surgery Today*, 2016, 46(4):405-413.
- [35] Lv Y, Zhang J, Liu Z, Tian Y, Liu F. A novel inflammation-based prognostic index for patients with esophageal squamous cell carcinoma: Neutrophil lymphocyte ratio/prealbumin ratio. *Medicine (Baltimore)*, 2019, 98(7):e14562.
- [36] Nakamura K, Yoshida N, Baba Y, Kosumi K, Uchihara T, Kiyozumi Y, Ohuchi M, Ishimoto T, Iwatsuki M, Sakamoto Y, Watanabe M, Baba H. Elevated preoperative neutrophil-to-lymphocytes ratio predicts poor prognosis after esophagectomy in T1 esophageal cancer. *International Journal of Clinical Oncology*, 2017, 22(3):469-475.
- [37] Sharaiha RZ, Halazun KJ, Mirza F, Port JL, Lee PC, Neugut AI, Altorki NK, Abrams JA. Elevated Preoperative Neutrophil:Lymphocyte Ratio as a Predictor of Postoperative Disease Recurrence in Esophageal Cancer. *Annals of Surgical Oncology*, 2011, 18(12):3362-3369.
- [38] Xiao Q, Zhang BH, Deng X, Wu J, Wang H, Wang YG, Wang WX. The Preoperative Neutrophil-To-Lymphocyte Ratio Is a Novel Immune Parameter for the Prognosis of Esophageal Basaloid Squamous Cell Carcinoma. *Plos One*, 2016, 11(12).
- [39] Zhou XL, Li YQ, Zhu WG, Yu CH, Song YQ, Wang WW, He DC, Tao GZ, Tong YS. Neutrophil-to-lymphocyte ratio as a prognostic biomarker for patients with locally advanced esophageal squamous cell carcinoma treated with definitive chemoradiotherapy. *Scientific Reports*, 2017, 7.
- [40] Arigami T, Okumura H, Matsumoto M, Uchikado Y, Uenosono Y, Kita Y, Owaki T, Mori S, Kurahara H, Kijima Y, Ishigami S, Natsugoe S. Analysis of the Fibrinogen and Neutrophil-Lymphocyte Ratio in Esophageal Squamous Cell Carcinoma A Promising Blood Marker of Tumor Progression and Prognosis. *Medicine*, 2015, 94(42).
- [41] Lindenmann J, Fink-Neuboeck N, Avian A, Pichler M, Habitzruther M, Maier A, Smolle-Juettner FM. Preoperative Glasgow Prognostic Score as additional independent prognostic parameter for patients with esophageal cancer after curative esophagectomy. *Ejso*, 2017, 43(2):445-453.
- [42] Ma QL, Liu WG, Jia R, Jiang F, Duan H, Lin P, Zhang LJ, Long H, Zhao HY, Ma GW. Inflammation-based prognostic system predicts postoperative survival of esophageal carcinoma patients with normal preoperative serum carcinoembryonic antigen and squamous cell carcinoma antigen levels. *World Journal of Surgical Oncology*, 2016, 14.
- [43] Okuno T, Wakabayashi M, Kato K, Shinoda M, Katayama H, Igaki H, Tsubosa Y, Kojima T, Okabe H, Kimura Y, Kawano T, Kosugi S, Toh Y, Kato H, Nakamura K, Fukuda H, Ishikura S, Ando N, Kitagawa Y. Esophageal stenosis and the Glasgow Prognostic Score as independent factors of poor prognosis for patients with locally advanced unresectable esophageal cancer treated with chemoradiotherapy (exploratory analysis of JCOG0303). *International Journal of Clinical Oncology*, 2017, 22(6):1042-1049.
- [44] Sugawara K, Mori K, Yagi K, Aikou S, Uemura Y, Yamashita H, Seto Y. Association of preoperative inflammation-based prognostic score with survival in patients undergoing salvage esophagectomy. *Diseases of the Esophagus*, 2018, 32(4).
- [45] Vashist YK, Loos J, Dedow J, Tachezy M, Uzunoglu G, Kutup A, Yekebas EF, Izbicki JR. Glasgow Prognostic Score is a Predictor of Perioperative and Long-term Outcome in Patients with only Surgically Treated Esophageal Cancer. *Annals of*

- Surgical Oncology, 2011, 18(4):1130-1138.
- [46] Hirahara N, Matsubara T, Hayashi H, Takai K, Fujii Y, Tajima Y. Impact of inflammation-based prognostic score on survival after curative thoracoscopic esophagectomy for esophageal cancer. *Ejso*, 2015, 41(10):1308-1315.
- [47] Kitagawa H, Namikawa T, Munekage M, Fujisawa K, Kawanishi Y, Kobayashi M, Hanazaki K. Preoperative patient-related factors associated with prognosis after esophagectomy for esophageal cancer. *Esophagus*, 2017, 14(4):360-365.
- [48] Jomrich G, Paireder M, Gleiss A, Kristo I, Harpain L, Schoppmann SF. Comparison of Inflammation-Based Prognostic Scores in a Cohort of Patients with Resectable Esophageal Cancer. *Gastroenterology Research and Practice*, 2017.
- [49] Kimura J, Kunisaki C, Makino H, Oshima T, Ota M, Oba M, Takagawa R, Kosaka T, Ono HA, Akiyama H, Endo I. Evaluation of the Glasgow Prognostic Score in patients receiving chemoradiotherapy for stage III and IV esophageal cancer. *Diseases of the Esophagus*, 2016, 29(8):1071-1080.
- [50] Chen P, Fang M, Wan QY, Zhang XB, Song T, Wu SX. High-sensitivity modified Glasgow prognostic score (HS-mGPS) Is superior to the mGPS in esophageal cancer patients treated with chemoradiotherapy. *Oncotarget*, 2017, 8(59):99861-99870.
- [51] Otowa Y, Nakamura T, Takiguchi G, Tomono A, Yamamoto M, Kanaji S, Imanishi T, Suzuki S, Tanaka K, Itoh T, Kakeji Y. Changes in modified Glasgow prognostic score after neoadjuvant chemotherapy is a prognostic factor in clinical stage II/III esophageal cancer. *Diseases of the Esophagus*, 2016, 29(2):146-151.
- [52] Tian R, Zhang F, Sun P, Wu J, Yan H, Wu AR, Zhang M, Jiang YL, Lu YH, Xu QY, Zhan XH, Zhang RX, Qian LT, He J. The preoperative sensitive-modified Glasgow prognostic score is superior to the modified Glasgow prognostic score in predicting long-term survival for esophageal squamous cell carcinoma. *Oncotarget*, 2016, 7(41):67485-67494.
- [53] Walsh SM, Casey S, Kennedy R, Ravi N, Reynolds JV. Does the Modified Glasgow Prognostic Score (mGPS) Have a Prognostic Role in Esophageal Cancer? *Journal of Surgical Oncology*, 2016, 113(7):732-737.
- [54] Zhang P, Xi M, Li QQ, He LR, Liu SL, Zhao L, Shen JX, Liu MZ. The Modified Glasgow Prognostic Score Is an Independent Prognostic Factor in Patients with Inoperable Thoracic Esophageal Squamous Cell Carcinoma Undergoing Chemoradiotherapy. *Journal of Cancer*, 2014, 5(8):689-695.
- [55] Sun P, Zhang F, Chen C, An X, Li YH, Wang FH, Zhu ZH. Comparison of the prognostic values of various nutritional parameters in patients with esophageal squamous cell carcinoma from Southern China. *Journal of Thoracic Disease*, 2013, 5(4):484-491.
- [56] Chen S, Yang X, Feng JF. A novel inflammation-based prognostic score for patients with esophageal squamous cell carcinoma: the c-reactive protein/prognostic nutritional index ratio. *Oncotarget*, 2016, 7(38):62123-62132.
- [57] Okadome K, Baba Y, Yagi T, Kiyozumi Y, Ishimoto T, Iwatsuki M, Miyamoto Y, Yoshida N, Watanabe M, Baba H. Prognostic Nutritional Index, Tumor-infiltrating Lymphocytes, and Prognosis in Patients with Esophageal Cancer. *Ann Surg*, 2018.
- [58] Migita K, Matsumoto S, Wakatsuki K, Ito M, Kunishige T, Nakade H, Sho M. The Prognostic Significance of the Geriatric Nutritional Risk Index in Patients with Esophageal Squamous Cell Carcinoma. *Nutrition and Cancer-an International Journal*, 2018, 70(8):1237-1245.
- [59] Zhang H, Guo XW, Yin XX, Liu YC, Ji SJ. Nomogram-Integrated C-Reactive Protein/Albumin Ratio Predicts Efficacy And Prognosis In Patients With Thoracic Esophageal Squamous Cell Carcinoma Receiving Chemoradiotherapy. *Cancer Management and Research*, 2019, 11:9459-9468.
- [60] Otowa Y, Nakamura T, Yamamoto M, Kanaji S, Matsuda Y, Matsuda T, Oshikiri T, Sumi Y, Suzuki S, Kakeji Y. C-reactive protein to albumin ratio is a prognostic factor for patients with cStage II/III esophageal squamous cell cancer. *Diseases of the Esophagus*, 2017, 30(12).
- [61] Liu XQ, Chen W, Qiao TK. Prognostic significance of serum C-reactive protein to albumin ratios in esophageal cancer patients receiving radical radiotherapy. *International Journal of Clinical and Experimental Medicine*, 2019, 12(6):7585-7592.
- [62] Shao YJ, Ning ZH, Chen J, Geng YT, Gu WD, Huang J, Pei HL, Shen YP, Jiang JT. Prognostic nomogram integrated systemic inflammation score for patients with esophageal squamous cell carcinoma undergoing radical esophagectomy. *Scientific Reports*, 2015, 5.
- [63] Liu DQ, Li FF, Jia WH. Cumulative scores based on plasma D-dimer and serum albumin levels predict survival in esophageal squamous cell carcinoma patients treated with transthoracic esophagectomy. *Chinese Journal of Cancer*, 2016, 35.
- [64] Wang CY, Lee TF, Fang CH, Chou JH. Fuzzy Logic-Based Prognostic Score for Outcome Prediction in Esophageal Cancer. *Ieee Transactions on Information Technology in Biomedicine*, 2012, 16(6):1224-1230.
- [65] Feng JF, Zhao Q, Chen QX. Prognostic Significance of Glasgow prognostic score in patients undergoing esophagectomy for esophageal squamous cell carcinoma. *Saudi Journal of Gastroenterology*, 2014, 20(1):48-53.
- [66] Lindenmann J, Fink-Neuboeck N, Koesslbacher M, Pichler M, Stojakovic T, Roller RE, Maier A, Anegg U, Smolle J, Smolle-Juettner FM. The Influence of Elevated Levels of C-Reactive Protein and Hypoalbuminemia on Survival in Patients with Advanced Inoperable Esophageal Cancer Undergoing Palliative Treatment. *Journal of Surgical Oncology*, 2014, 110(6):645-650.
- [67] Matsuda S, Takeuchi H, Kawakubo H, Fukuda K, Nakamura R, Takahashi T, Wada N, Saikawa Y, Omori T, Kitagawa Y. Cumulative Prognostic Scores Based on Plasma Fibrinogen and Serum Albumin Levels in Esophageal Cancer Patients Treated with Transthoracic Esophagectomy: Comparison with the Glasgow Prognostic Score. *Annals of Surgical Oncology*, 2015, 22(1):302-310.
- [68] Liu XM, Li MH, Zhao F, Zhu YM, Luo YJ, Kong L, Zhu H, Zhang Y, Shi F, Yu JM. The lymphocyte-monocyte ratio predicts tumor response and survival in patients with locally advanced esophageal cancer who received definitive chemoradiotherapy. *Oncotargets and Therapy*, 2017, 10:871-877.
- [69] Tian R, Yan H, Zhang F, Sun P, Wu AR, Zhang M, Jiang YL, Wu J, Lu YH, Xu QY, Zhan XH, Zhang RX, Qian LT, He J. Cumulative score based on preoperative plasma fibrinogen and serum C-reactive protein could predict long-term survival for esophageal squamous cell carcinoma. *Oncotarget*, 2016, 7(38):61533-61543.
- [70] Nakamura M, Iwashita M, Nakamori M, Ojima T, Katsuda M, Iida T, Hayata K, Kato T, Yamaue H. New prognostic score for the survival of patients with esophageal squamous cell carcinoma. *Surg Today*, 2014, 44(5):875-883.
- [71] Han L, Song Q, Jia Y, Chen X, Wang C, Chen P, Min R, Cheng Y. The clinical significance of systemic inflammation score in esophageal squamous cell carcinoma. *Tumour Biol*, 2015, 37(3):3081-3090.
- [72] Miyazaki T, Sakai M, Sohda M, Tanaka N, Yokobori T, Motegi Y, Nakajima M, Fukuchi M, Kato H, Kuwano H. Prognostic Significance of Inflammatory and Nutritional Parameters in Patients with Esophageal Cancer. *Anticancer Res*, 2016, 36(12):6557-6562.
