# Supplementary material
Source: HighWire-hosted journal article supplement (https://bmjopen.bmj.com/content/11/9/e048324)
Supplement: inline-supplementary-material-4 [file inline-supplementary-material-4.pdf]

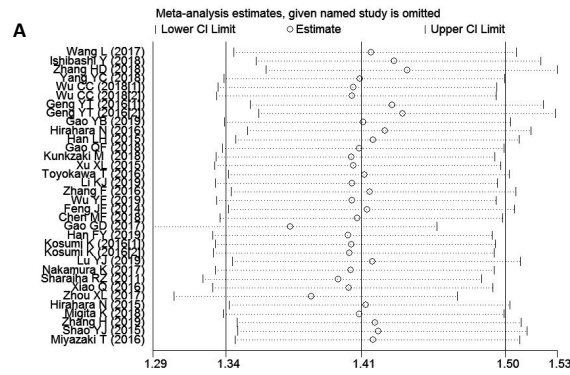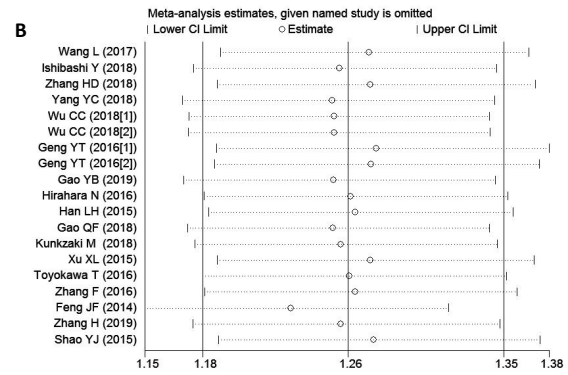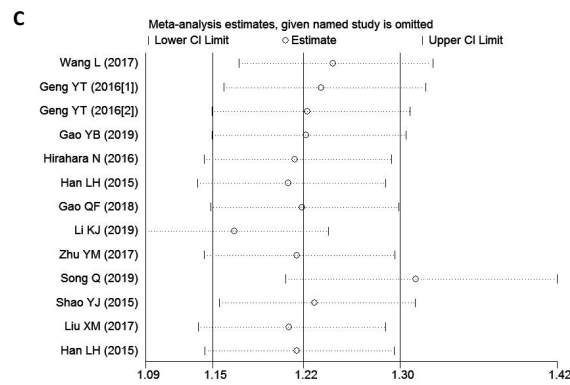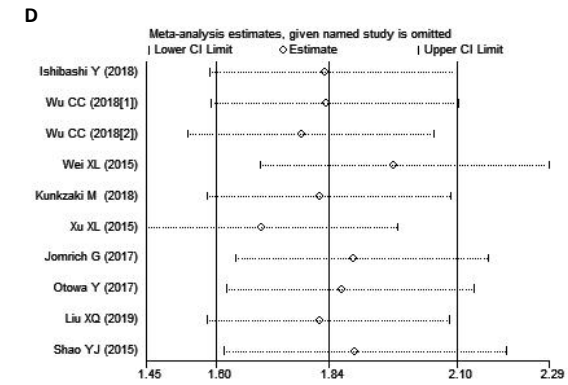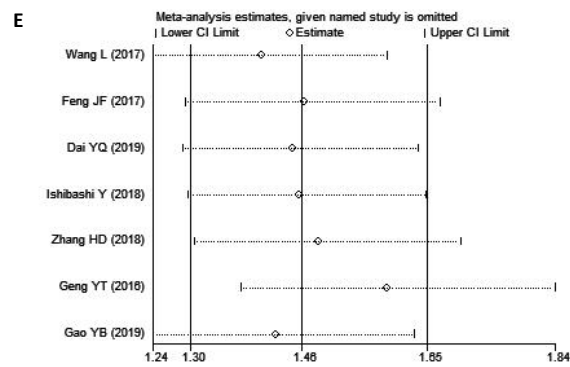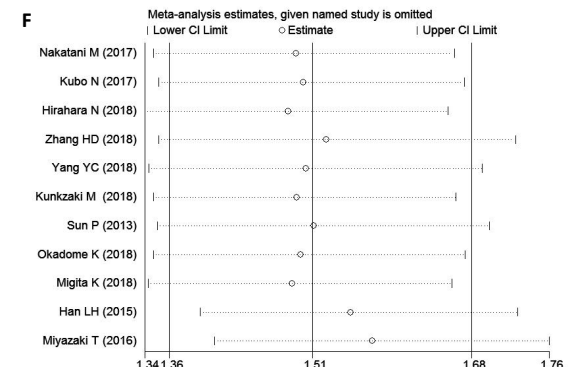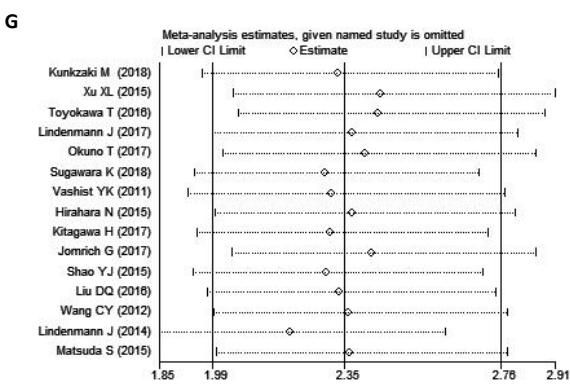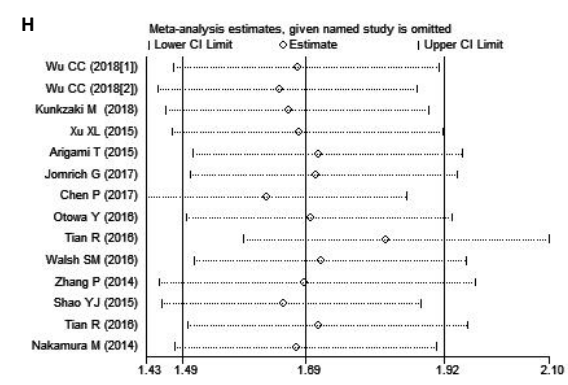

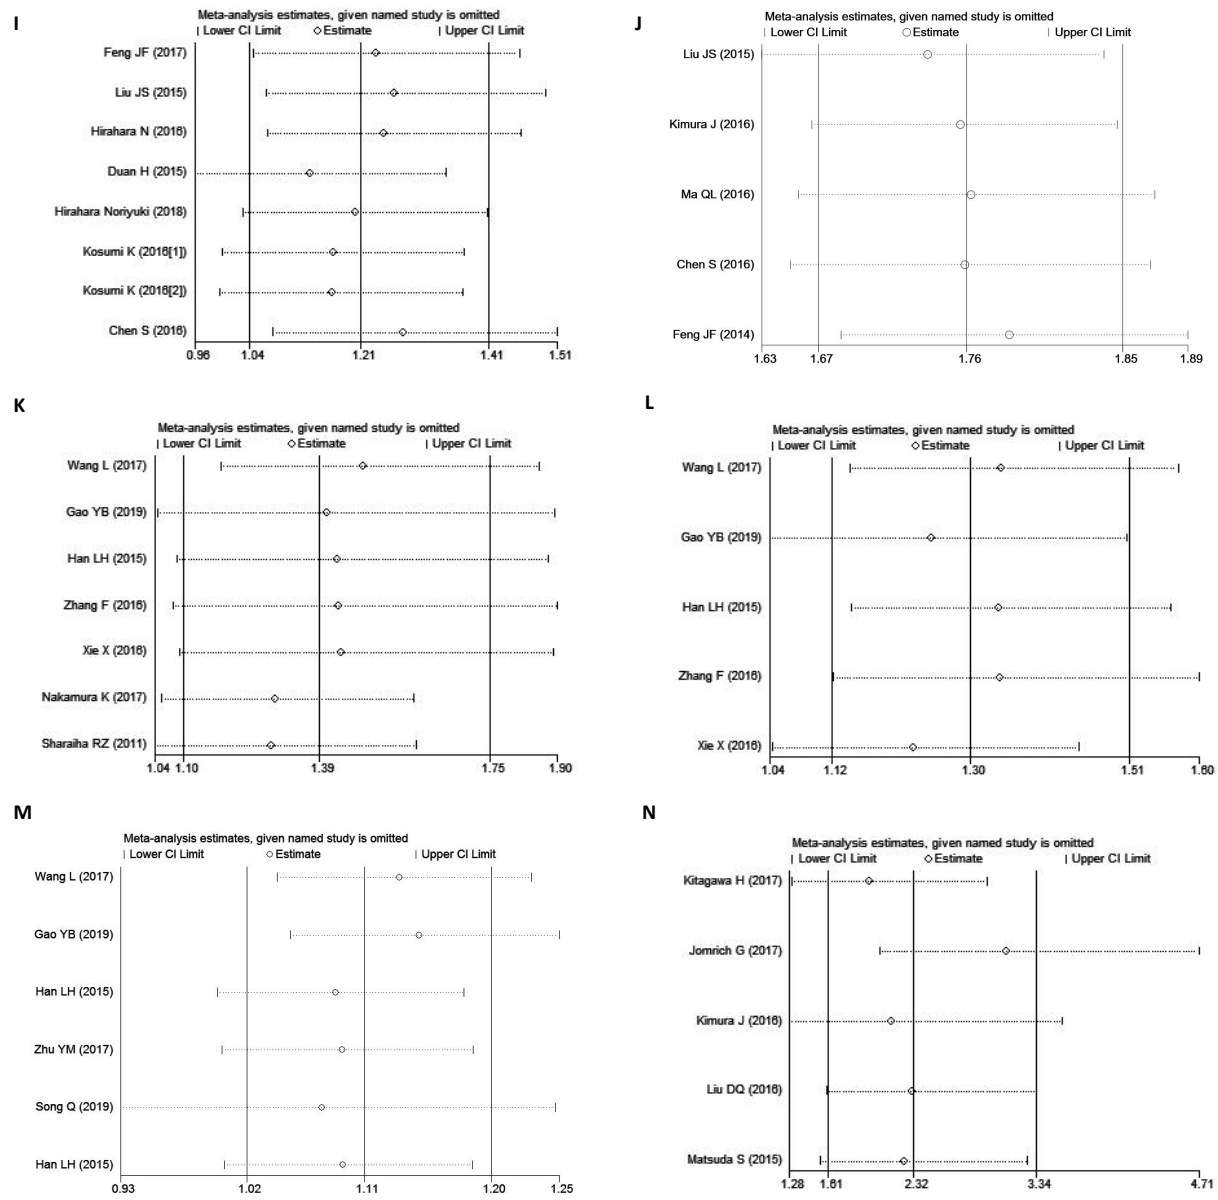

Figure 1. Sensitivity analyses of HR for 8 indicators in OS, CSS and DFS.

(A)NLR-OS; (B) PLR-OS; (C) LMR-OS; (D) CAR-OS; (E) SII-OS; (F) PNI-OS; (G) GPS-OS; (H) mGPS-OS; (I) NLR-CSS; (J) GPS-CSS; (K) NLR-DFS; (L) PLR-DFS; (M) LMR-DFS; (N) GPS-DFS.

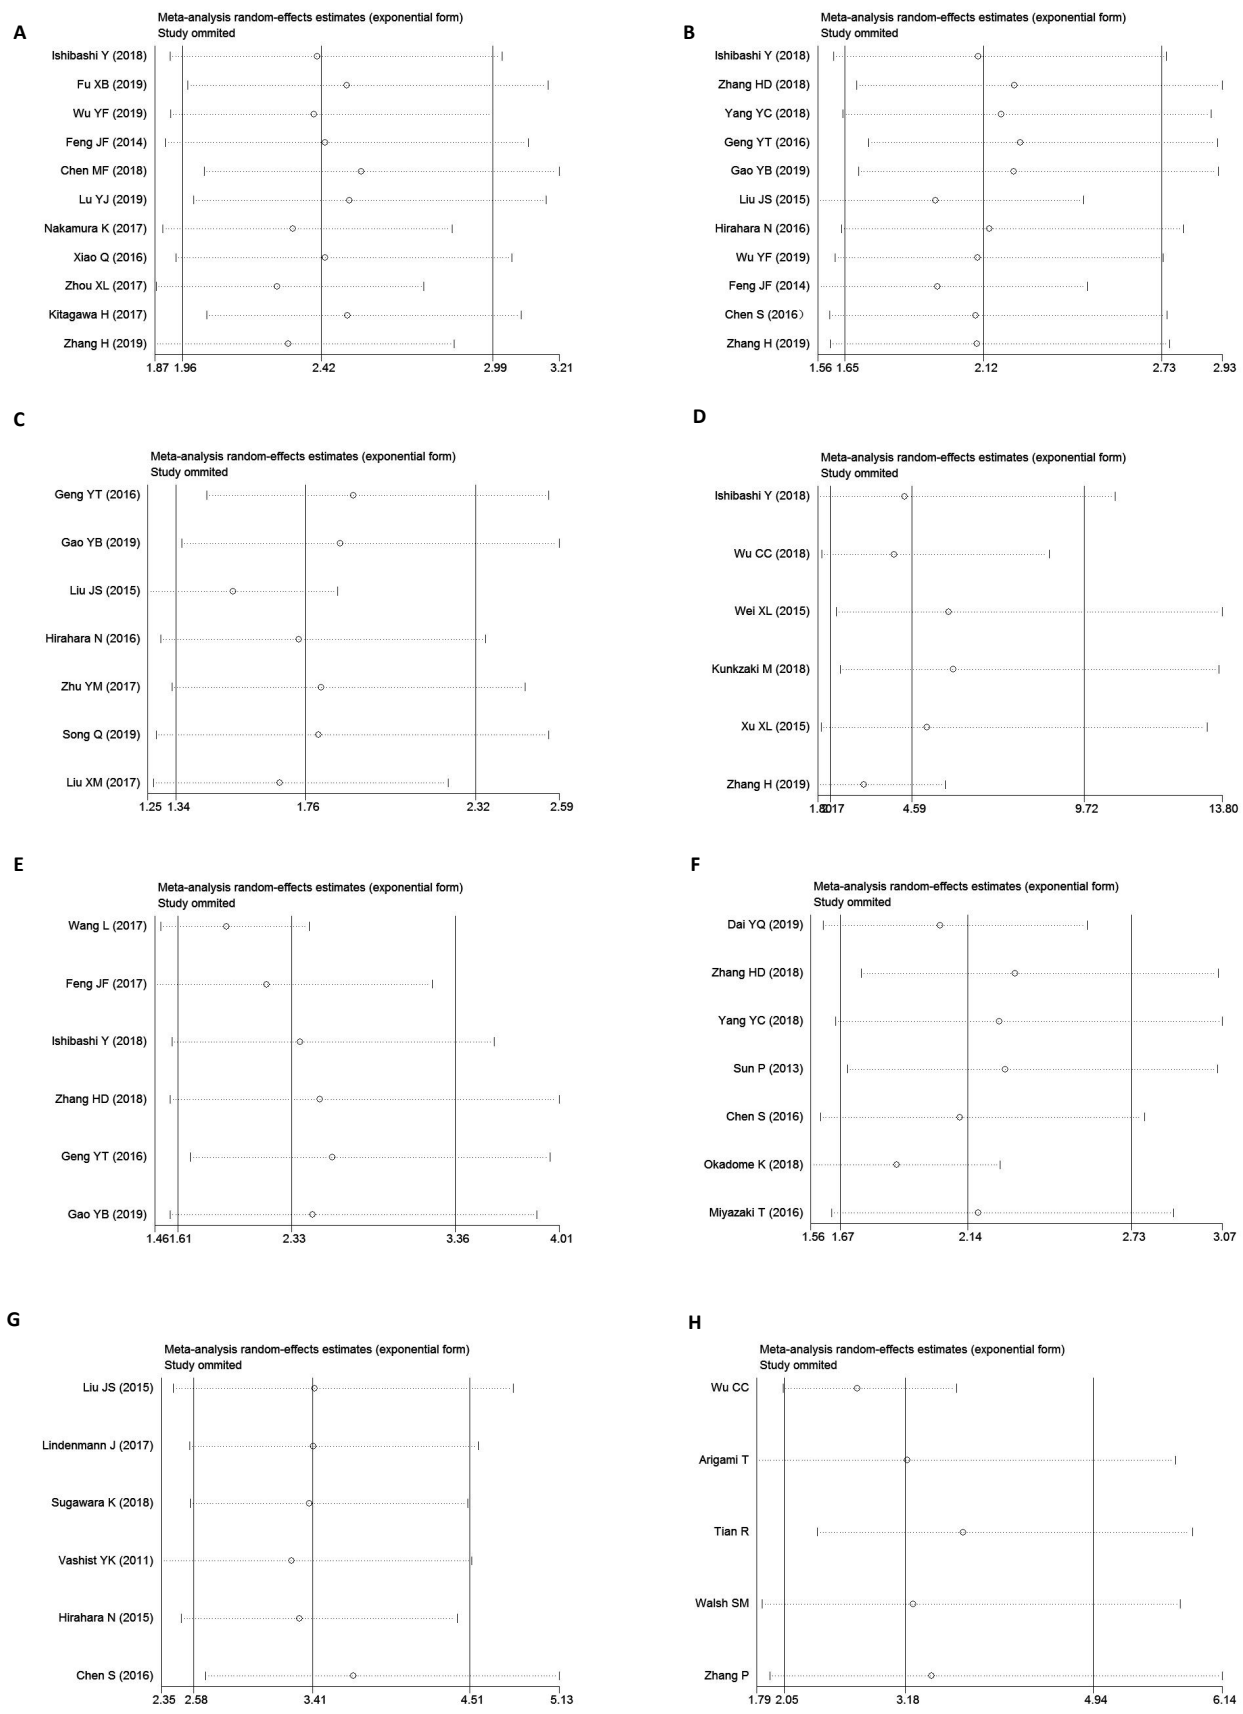

Figure 2. Sensitivity analyses of DOR for 8 indicators in 5-year OS of EC. (A) NLR; (B) PLR; (C) LMR; (D) CAR; (E) SII; (F) PNI; (G) GPS; (H) mGPS;
