# Supplementary material
Source: HighWire-hosted journal article supplement (https://bmjopen.bmj.com/content/11/9/e048324)
Supplement: inline-supplementary-material-5 [file inline-supplementary-material-5.pdf]

**Table 1. Subgroup and meta regression of sensitivity and specificity of prognostic indicators.**

| Category       | NO. of Trails | Sensitivity (95%) | I <sup>2</sup> (%), P | P-reg  | Specificity (95%) | I <sup>2</sup> (%), P | P-reg  |
|----------------|---------------|-------------------|-----------------------|--------|-------------------|-----------------------|--------|
| <b>SII</b>     |               |                   |                       |        |                   |                       |        |
| Overall        | 6             | 0.61(0.48-0.73)   | 96.2, <0.001          |        | 0.60(0.45-0.73)   | 96.3, <0.001          |        |
| Country        |               |                   |                       |        |                   |                       |        |
| China          | 5             | 0.64(0.52-0.76)   | 96.6, <0.001          | 0.42   | 0.57(0.42-0.72)   | 96.9, <0.001          | 0.41   |
| Non-China      | 1             | 0.46(0.15-0.76)   | NR                    |        | 0.71(0.41-1.00)   | NR                    |        |
| Sample size    |               |                   |                       |        |                   |                       |        |
| ≤298           | 3             | 0.65(0.48-0.81)   | 94.7, <0.001          | 0.43   | 0.67(0.49-0.85)   | 93.0, <0.001          | 0.28   |
| >298           | 3             | 0.59(0.42-0.76)   | 97.7, <0.001          |        | 0.54(0.35-0.74)   | 97.7, <0.001          |        |
| Cut-off value  |               |                   |                       |        |                   |                       |        |
| ≤410           | 3             | 0.73(0.66-0.81)   | 84.1, 0.002           | <0.001 | 0.42(0.38-0.47)   | 54.7, 0.110           | <0.001 |
| >410           | 3             | 0.47(0.37-0.57)   | 90.2, <0.001          |        | 0.76(0.72-0.81)   | 0.0, 0.541            |        |
| Treatment      |               |                   |                       |        |                   |                       |        |
| Surgery        | 6             | 0.61(0.48-0.73)   | 96.2, <0.001          | NR     | 0.60(0.45-0.73)   | 96.3, <0.001          | NR     |
| CRT            | 0             | NR                | NR                    |        | NR                | NR                    |        |
| Pathology      |               |                   |                       |        |                   |                       |        |
| SCC            | 5             | 0.64(0.52-0.76)   | 96.6, <0.001          | 0.42   | 0.57(0.42-0.72)   | 96.9, <0.001          | 0.41   |
| Mixed          | 1             | 0.46(0.15-0.76)   | NR                    |        | 0.71(0.41-1.00)   | NR                    |        |
| Clinical stage |               |                   |                       |        |                   |                       |        |
| 0-III          | 5             | 0.61(0.47-0.74)   | 96.9, <0.001          | 0.88   | 0.54(0.40-0.68)   | 95.9, <0.001          | 0.10   |
| 0-IV           | 1             | 0.60(0.30-0.91)   | NR                    |        | 0.78(0.56-1.00)   | NR                    |        |
| Follow-up      |               |                   |                       |        |                   |                       |        |
| ≤36            | 2             | 0.66(0.61-0.70)   | 53.0, 0.145           | 0.07   | 0.57(0.52-0.62)   | 97.6, <0.001          | 0.94   |
| >36            | 2             | 0.57(0.54-0.61)   | 98.7, <0.001          |        | 0.52(0.48-0.56)   | 98.8, <0.001          |        |
| NR             | 2             | 0.71(0.65-0.76)   | 97.0, <0.001          |        | 0.55(0.46-0.63)   | 90.0, 0.002           |        |
| Age            |               |                   |                       |        |                   |                       |        |
| ≤63.0          | 3             | 0.59(0.42-0.76)   | 97.7, <0.001          | 0.93   | 0.54(0.35-0.74)   | 97.7, <0.001          | 0.67   |
| >63.0          | 2             | 0.55(0.48-0.62)   | 77.6, 0.035           |        | 0.76(0.70-0.82)   | 17.4, 0.271           |        |
| NR             | 1             | NR                | NR                    |        | NR                | NR                    |        |
| Sex ratio      |               |                   |                       |        |                   |                       |        |
| ≤4.55          | 3             | 0.59(0.42-0.76)   | 97.7, <0.001          | 0.93   | 0.54(0.35-0.74)   | 97.7, <0.001          | 0.67   |
| >4.55          | 3             | 0.65(0.48-0.81)   | 94.7, <0.001          |        | 0.67(0.49-0.85)   | 93.0, <0.001          |        |
| <b>PNI</b>     |               |                   |                       |        |                   |                       |        |
| Overall        | 7             | 0.51(0.41-0.61)   | 95.6, <0.001          |        | 0.67(0.56-0.77)   | 95.0, <0.001          |        |
| Country        |               |                   |                       |        |                   |                       |        |
| China          | 5             | 0.52(0.40-0.64)   | 97.0, <0.001          | 0.82   | 0.63(0.51-0.76)   | 95.8, <0.001          | 0.09   |
| Non-China      | 2             | 0.48(0.29-0.68)   | 0.0, 0.412            |        | 0.76(0.60-0.91)   | 40.1, 0.196           |        |
| Sample size    |               |                   |                       |        |                   |                       |        |
| ≤255           | 2             | 0.51(0.31-0.71)   | 54.7, 0.137           | 0.99   | 0.72(0.53-0.91)   | 0.0, 0.612            | 0.30   |
| >255           | 5             | 0.51(0.39-0.63)   | 97.0, <0.001          |        | 0.66(0.53-0.79)   | 96.4, <0.001          |        |
| Cut-off value  |               |                   |                       |        |                   |                       |        |
| ≤46            | 2             | 0.44(0.26-0.62)   | 75.3, 0.044           | 0.51   | 0.80(0.67-0.93)   | 0.0, 0.963            | 0.01   |

|                       |    |                 |              |      |                 |              |      |
|-----------------------|----|-----------------|--------------|------|-----------------|--------------|------|
| >46                   | 5  | 0.53(0.42-0.65) | 96.5, <0.001 |      | 0.62(0.50-0.73) | 95.4, <0.001 |      |
| <b>Treatment</b>      |    |                 |              |      |                 |              |      |
| Surgery               | 5  | 0.54(0.44-0.65) | 94.2, <0.001 | 0.30 | 0.65(0.52-0.78) | 95.3, <0.001 | 0.22 |
| Mixed                 | 1  | NR              | NR           |      | NR              | NR           |      |
| NR                    | 1  | NR              | NR           |      | NR              | NR           |      |
| <b>Pathology</b>      |    |                 |              |      |                 |              |      |
| SCC                   | 5  | 0.52(0.40-0.64) | 97.0, <0.001 | 0.82 | 0.63(0.51-0.76) | 95.8, <0.001 | 0.09 |
| Mixed                 | 2  | 0.48(0.29-0.68) | 0.0, 0.412   |      | 0.76(0.60-0.91) | 40.1, 0.196  |      |
| <b>Clinical stage</b> |    |                 |              |      |                 |              |      |
| 0-III                 | 4  | 0.58(0.47-0.68) | 94.8, <0.001 | 0.17 | 0.60(0.47-0.73) | 93.7, <0.001 | 0.01 |
| 0-IV                  | 3  | 0.41(0.29-0.53) | 84.8, 0.001  |      | 0.76(0.65-0.87) | 5.0, 0.349   |      |
| <b>Follow-up</b>      |    |                 |              |      |                 |              |      |
| ≤36                   | 5  | 0.48(0.36-0.60) | 96.1, <0.001 | 0.64 | 0.69(0.57-0.82) | 94.3, <0.001 | 0.30 |
| >36                   | 2  | 0.57(0.39-0.75) | 89.2, 0.002  |      | 0.62(0.42-0.83) | 97.4, <0.001 |      |
| <b>Age</b>            |    |                 |              |      |                 |              |      |
| ≤63.4                 | 3  | 0.51(0.35-0.67) | 98.2, <0.001 | 0.88 | 0.75(0.62-0.88) | 97.1, <0.001 | 0.99 |
| >63.4                 | 2  | 0.48(0.41-0.55) | 0.0, 0.412   |      | 0.76(0.70-0.81) | 40.1, 0.196  |      |
| NR                    | 2  | 0.44(0.38-0.50) | 85.4, 0.009  |      | 0.79(0.71-0.86) | 0.0, 0.737   |      |
| <b>Sex ratio</b>      |    |                 |              |      |                 |              |      |
| ≤4.75                 | 4  | 0.56(0.44-0.68) | 97.2, <0.001 | 0.43 | 0.59(0.47-0.71) | 96.0, <0.001 | 0.75 |
| >4.75                 | 3  | 0.45(0.31-0.59) | 50.8, 0.131  |      | 0.77(0.67-0.88) | 11.6, 0.323  |      |
| <b>NLR</b>            |    |                 |              |      |                 |              |      |
| Overall               | 11 | 0.51(0.47-0.54) | 77.1, <0.001 |      | 0.70(0.64-0.76) | 79.1, <0.001 |      |
| <b>Country</b>        |    |                 |              |      |                 |              |      |
| China                 | 8  | 0.51(0.47-0.55) | 83.8, <0.001 | 0.98 | 0.70(0.64-0.77) | 71.5, 0.001  | 0.04 |
| Non-China             | 3  | 0.50(0.41-0.60) | 0.0, 0.800   |      | 0.71(0.60-0.81) | 91.4, <0.001 |      |
| <b>Sample size</b>    |    |                 |              |      |                 |              |      |
| ≤297                  | 6  | 0.56(0.50-0.61) | 0.0, 0.462   | 0.14 | 0.70(0.62-0.78) | 78.8, <0.001 | 0.03 |
| >297                  | 5  | 0.48(0.43-0.53) | 88.5, <0.001 |      | 0.72(0.64-0.79) | 83.6, <0.001 |      |
| <b>Cut-off value</b>  |    |                 |              |      |                 |              |      |
| ≤2.5                  | 3  | 0.47(0.42-0.53) | 33.5, 0.223  | 0.76 | 0.75(0.70-0.80) | 65.6, 0.055  | 0.06 |
| >2.5                  | 7  | 0.51(0.46-0.55) | 84.2, <0.001 |      | 0.71(0.64-0.78) | 75.8, <0.001 |      |
| NR                    | 1  | NR              | NR           |      | NR              | NR           |      |
| <b>Treatment</b>      |    |                 |              |      |                 |              |      |
| Surgery               | 7  | 0.48(0.43-0.52) | 0.0, 0.619   | 0.31 | 0.71(0.63-0.78) | 75.8, <0.001 | 0.05 |
| Mixed                 | 4  | 0.53(0.48-0.58) | 89.3, <0.001 |      | 0.71(0.61-0.81) | 85.8, 0.001  |      |
| <b>Pathology</b>      |    |                 |              |      |                 |              |      |
| SCC                   | 8  | 0.51(0.47-0.55) | 83.8, <0.001 | 0.98 | 0.70(0.64-0.77) | 71.5, 0.001  | 0.04 |
| Mixed                 | 3  | 0.50(0.41-0.60) | 0.0, 0.800   |      | 0.71(0.60-0.81) | 91.4, <0.001 |      |
| <b>Clinical stage</b> |    |                 |              |      |                 |              |      |
| 0-III                 | 6  | 0.54(0.50-0.58) | 55.0, 0.049  | 0.14 | 0.70(0.62-0.78) | 78.8, <0.001 | 0.02 |
| 0-IV                  | 5  | 0.46(0.42-0.50) | 0.0, 0.642   |      | 0.71(0.63-0.79) | 83.6, <0.001 |      |
| <b>Follow-up</b>      |    |                 |              |      |                 |              |      |
| ≤37                   | 4  | 0.47(0.44-0.51) | 65.3, 0.034  | NR   | 0.68(0.61-0.73) | 86.9, <0.001 | NR   |

|                       |    |                 |              |      |                 |              |      |
|-----------------------|----|-----------------|--------------|------|-----------------|--------------|------|
| >37                   | 2  | 0.44(0.38-0.52) | 0.0, 0.497   |      | 0.76(0.71-0.81) | 76.6, 0.039  |      |
| NR                    | 5  | 0.54(0.52-0.57) | 80.7, <0.001 |      | 0.68(0.65-0.72) | 70.5, 0.009  |      |
| <b>Age</b>            |    |                 |              |      |                 |              |      |
| ≤61.1                 | 4  | 0.47(0.43-0.51) | 37.4, 0.187  | 0.92 | 0.72(0.68-0.76) | 0.0, 0.861   | 0.07 |
| >61.1                 | 6  | 0.53(0.47-0.59) | 70.9, 0.004  |      | 0.73(0.66-0.80) | 84.6, <0.001 |      |
| NR                    | 1  | NR              | NR           |      | NR              | NR           |      |
| <b>Sex ratio</b>      |    |                 |              |      |                 |              |      |
| ≤5.12                 | 5  | 0.50(0.44-0.55) | 78.3, 0.001  | 0.91 | 0.70(0.62-0.78) | 83.1, <0.001 | 0.03 |
| >5.12                 | 6  | 0.51(0.46-0.56) | 53.3, 0.058  |      | 0.71(0.63-0.78) | 79.3, <0.001 |      |
| <b>CAR</b>            |    |                 |              |      |                 |              |      |
| Overall               | 6  | 0.50(0.38-0.62) | 94.8, <0.001 |      | 0.84(0.71-0.91) | 89.2, <0.001 |      |
| <b>Country</b>        |    |                 |              |      |                 |              |      |
| China                 | 4  | 0.45(0.32-0.59) | 95.9, <0.001 | 0.31 | 0.87(0.81-0.94) | 90.1, <0.001 | 0.64 |
| Non-China             | 2  | 0.60(0.41-0.80) | 81.0, 0.022  |      | 0.68(0.51-0.85) | 38.4, 0.203  |      |
| <b>Sample size</b>    |    |                 |              |      |                 |              |      |
| ≤283                  | 4  | 0.60(0.51-0.69) | 66.7, 0.029  | 0.04 | 0.82(0.70-0.94) | 86.7, <0.001 | 0.61 |
| >283                  | 2  | 0.33(0.23-0.43) | 94.4, <0.001 |      | 0.85(0.71-0.98) | 95.7, <0.001 |      |
| <b>Cut-off value</b>  |    |                 |              |      |                 |              |      |
| ≤0.13                 | 4  | 0.56(0.44-0.68) | 87.9, <0.001 | 0.28 | 0.77(0.67-0.86) | 85.4, <0.001 | 0.46 |
| >0.13                 | 2  | 0.37(0.21-0.53) | 96.1, <0.001 |      | 0.94(0.88-1.00) | 0.0, 0.665   |      |
| <b>Treatment</b>      |    |                 |              |      |                 |              |      |
| Surgery               | 2  | 0.45(0.24-0.66) | 98.2, <0.001 | 0.71 | 0.85(0.72-0.98) | 91.2, 0.001  | 0.66 |
| Mixed                 | 4  | 0.53(0.38-0.67) | 81.3, 0.001  |      | 0.81(0.69-0.93) | 87.8, <0.001 |      |
| <b>Pathology</b>      |    |                 |              |      |                 |              |      |
| SCC                   | 4  | 0.53(0.38-0.67) | 81.3, 0.001  | 0.65 | 0.81(0.69-0.93) | 87.8, <0.001 | 0.25 |
| Mixed                 | 2  | 0.45(0.24-0.66) | 98.2, <0.001 |      | 0.85(0.72-0.98) | 91.2, 0.001  |      |
| <b>Clinical stage</b> |    |                 |              |      |                 |              |      |
| 0-III                 | 3  | 0.46(0.29-0.63) | 97.2, <0.001 | 0.62 | 0.91(0.88-0.95) | 0.0, 0.814   | 0.22 |
| 0-IV                  | 3  | 0.54(0.37-0.71) | 88.1, <0.001 |      | 0.71(0.66-0.76) | 29.6, 0.242  |      |
| <b>Follow-up</b>      |    |                 |              |      |                 |              |      |
| ≤40                   | 1  | NR              | NR           | NR   | NR              | NR           | NR   |
| >40                   | 1  | NR              | NR           |      | NR              | NR           |      |
| NR                    | 4  | 0.60(0.55-0.65) | 66.7, 0.029  |      | 0.80(0.74-0.85) | 86.7, <0.001 |      |
| <b>Age</b>            |    |                 |              |      |                 |              |      |
| ≤62.2                 | 3  | 0.39(0.28-0.50) | 93.8, <0.001 | 0.08 | 0.87(0.77-0.97) | 92.3, <0.001 | 0.08 |
| >62.2                 | 3  | 0.62(0.50-0.74) | 63.3, 0.066  |      | 0.78(0.63-0.92) | 89.5, <0.001 |      |
| <b>Sex ratio</b>      |    |                 |              |      |                 |              |      |
| ≤5.5                  | 4  | 0.56(0.44-0.68) | 87.9, <0.001 | 0.28 | 0.77(0.67-0.86) | 85.4, <0.001 | 0.46 |
| >5.5                  | 2  | 0.37(0.21-0.53) | 96.1, <0.001 |      | 0.94(0.88-1.00) | 0.0, 0.665   |      |
| <b>PLR</b>            |    |                 |              |      |                 |              |      |
| Overall               | 11 | 0.53(0.47-0.59) | 88.6, <0.001 |      | 0.65(0.60-0.70) | 78.9, <0.001 |      |
| <b>Country</b>        |    |                 |              |      |                 |              |      |
| China                 | 9  | 0.50(0.45-0.56) | 87.5, <0.001 | 0.02 | 0.68(0.64-0.72) | 78.8, <0.001 | 0.64 |
| Non-China             | 2  | 0.67(0.55-0.78) | 74.5, 0.048  |      | 0.52(0.39-0.64) | 0.0, 0.331   |      |

|                       |    |                 |              |      |                 |              |        |
|-----------------------|----|-----------------|--------------|------|-----------------|--------------|--------|
| <b>Sample size</b>    |    |                 |              |      |                 |              |        |
| ≤303                  | 4  | 0.62(0.54-0.70) | 61.2, 0.052  | 0.02 | 0.58(0.49-0.68) | 37.6, 0.186  | 0.44   |
| >303                  | 7  | 0.49(0.43-0.54) | 89.5, <0.001 |      | 0.68(0.64-0.73) | 84.0, <0.001 |        |
| <b>Cut-off value</b>  |    |                 |              |      |                 |              |        |
| ≤143                  | 5  | 0.48(0.41-0.56) | 93.1, <0.001 | 0.54 | 0.62(0.55-0.69) | 87.4, <0.001 | 0.16   |
| >143                  | 5  | 0.57(0.53-0.60) | 28.3, 0.233  |      | 0.70(0.66-0.73) | 55.1, 0.064  |        |
| NR                    | 1  | NR              | NR           |      | NR              | NR           |        |
| <b>Treatment</b>      |    |                 |              |      |                 |              |        |
| Surgery               | 9  | 0.52(0.46-0.59) | 90.4, <0.001 | 0.44 | 0.66(0.60-0.71) | 83.1, <0.001 | 0.20   |
| Mixed                 | 2  | 0.57(0.43-0.71) | 0.0, 0.875   |      | 0.65(0.52-0.79) | 0.0, 0.808   |        |
| <b>Pathology</b>      |    |                 |              |      |                 |              |        |
| SCC                   | 10 | 0.51(0.46-0.56) | 86.7, <0.001 | 0.01 | 0.67(0.63-0.71) | 77.4, <0.001 | 0.31   |
| Mixed                 | 1  | 0.73(0.59-0.88) | NR           |      | 0.47(0.29-0.65) | NR           |        |
| <b>Clinical stage</b> |    |                 |              |      |                 |              |        |
| 0-III                 | 10 | 0.51(0.46-0.56) | 86.7, <0.001 | 0.01 | 0.67(0.63-0.71) | 77.4, <0.001 | 0.31   |
| 0-IV                  | 1  | 0.73(0.59-0.88) | NR           |      | 0.47(0.29-0.65) | NR           |        |
| <b>Follow-up</b>      |    |                 |              |      |                 |              |        |
| ≤39                   | 4  | 0.47(0.45-0.50) | 86.9, <0.001 | NR   | 0.62(0.59-0.66) | 84.7, <0.001 | NR     |
| >39                   | 3  | 0.47(0.43-0.52) | 92.0, <0.001 |      | 0.71(0.67-0.76) | 73.0, 0.025  |        |
| NR                    | 4  | 0.58(0.55-0.62) | 80.1, 0.002  |      | 0.66(0.62-0.71) | 71.9, 0.014  |        |
| <b>Age</b>            |    |                 |              |      |                 |              |        |
| ≤61.2                 | 7  | 0.49(0.43-0.56) | 89.8, <0.001 | 0.58 | 0.68(0.63-0.73) | 83.6, <0.001 | <0.001 |
| >61.2                 | 3  | 0.62(0.57-0.67) | 71.0, 0.032  |      | 0.58(0.50-0.65) | 49.8, 0.137  |        |
| NR                    | 1  | NR              | NR           |      | NR              | NR           |        |
| <b>Sex ratio</b>      |    |                 |              |      |                 |              |        |
| ≤4.55                 | 5  | 0.46(0.39-0.52) | 90.0, <0.001 | 0.20 | 0.65(0.58-0.72) | 84.5, <0.001 | 0.04   |
| >4.55                 | 6  | 0.60(0.53-0.66) | 67.9, 0.008  |      | 0.67(0.60-0.74) | 73.3, 0.002  |        |
| <b>GPS</b>            |    |                 |              |      |                 |              |        |
| Overall               | 6  | 0.48(0.43-0.54) | 44.1, 0.111  |      | 0.79(0.72-0.85) | 20.0, 0.282  |        |
| <b>Country</b>        |    |                 |              |      |                 |              |        |
| China                 | 2  | 0.51(0.44-0.58) | 0.0, 0.372   | 0.51 | 0.75(0.67-0.82) | 0.0, 0.920   | <0.001 |
| Non-China             | 4  | 0.47(0.39-0.54) | 62.6, 0.045  |      | 0.83(0.75-0.90) | 23.9, 0.268  |        |
| <b>Sample size</b>    |    |                 |              |      |                 |              |        |
| ≤237                  | 3  | 0.41(0.34-0.49) | 0.0, 0.663   | 0.03 | 0.86(0.78-0.94) | 0.0, 0.464   | <0.001 |
| >237                  | 3  | 0.52(0.49-0.56) | 0.0, 0.486   |      | 0.75(0.70-0.80) | 0.0, 0.918   |        |
| <b>Cut-off value</b>  |    |                 |              |      |                 |              |        |
| 1-2 VS 0              | 3  | 0.47(0.39-0.54) | 62.0, 0.072  | 0.51 | 0.81(0.73-0.89) | 59.8, 0.083  | <0.001 |
| 2 VS 0                | 3  | 0.50(0.44-0.57) | 35.4, 0.213  |      | 0.77(0.69-0.85) | 0.0, 0.651   |        |
| <b>Treatment</b>      |    |                 |              |      |                 |              |        |
| Surgery               | 6  | 0.48(0.43-0.54) | 44.1, 0.111  | NR   | 0.79(0.72-0.85) | 20.0, 0.282  | NR     |
| Mixed                 | 0  | NR              | NR           |      | NR              | NR           |        |
| <b>Pathology</b>      |    |                 |              |      |                 |              |        |
| SCC                   | 2  | 0.51(0.46-0.56) | 0.0, 0.372   | 0.94 | 0.75(0.68-0.80) | 0.0, 0.920   | 0.01   |
| Mixed                 | 3  | 0.48(0.40-0.55) | 48.8, 0.142  |      | 0.79(0.71-0.86) | 0.0, 0.714   |        |

|                |   |                 |              |      |                 |             |      |
|----------------|---|-----------------|--------------|------|-----------------|-------------|------|
| NR             | 1 | NR              | NR           |      | NR              | NR          |      |
| Clinical stage |   |                 |              |      |                 |             |      |
| 0-III          | 4 | 0.47(0.41-0.54) | 43.1, 0.153  | 0.78 | 0.79(0.72-0.86) | 47.3, 0.127 | 0.05 |
| 0-IV           | 2 | 0.51(0.42-0.60) | 56.9, 0.128  |      | 0.80(0.69-0.91) | 0.0, 0.458  |      |
| Follow-up      |   |                 |              |      |                 |             |      |
| ≤40            | 1 | NR              | NR           | NR   | NR              | NR          | NR   |
| >40            | 1 | NR              | NR           |      | NR              | NR          |      |
| NR             | 4 | 0.50(0.46-0.54) | 56.5, 0.076  |      | 0.78(0.73-0.83) | 41.7, 0.161 |      |
| Age            |   |                 |              |      |                 |             |      |
| ≤62.1          | 1 | NR              | NR           |      | NR              | NR          |      |
| >62.1          | 3 | 0.51(0.47-0.56) | 48.8, 0.142  | 0.65 | 0.78(0.70-0.85) | 0.0, 0.714  | 0.01 |
| NR             | 2 | 0.47(0.37-0.57) | 61.2, 0.108  |      | 0.81(0.72-0.90) | 79.6, 0.027 |      |
| Sex ratio      |   |                 |              |      |                 |             |      |
| ≤5.48          | 2 | 0.51(0.42-0.60) | 56.9, 0.128  | 0.78 | 0.80(0.69-0.91) | 0.0, 0.458  | 0.05 |
| >5.48          | 4 | 0.47(0.41-0.54) | 43.1, 0.153  |      | 0.79(0.72-0.86) | 47.3, 0.127 |      |
| <b>LMR</b>     |   |                 |              |      |                 |             |      |
| Overall        | 7 | 0.54(0.48-0.61) | 84.9, <0.001 |      | 0.60(0.54-0.65) | 73.5, 0.001 |      |
| Country        |   |                 |              |      |                 |             |      |
| China          | 6 | 0.53(0.47-0.59) | 85.8, <0.001 | 0.20 | 0.60(0.55-0.66) | 77.4, 0.001 | 0.94 |
| Non-China      | 1 | 0.63(0.47-0.79) | NR           |      | 0.55(0.37-0.72) | NR          |      |
| Sample size    |   |                 |              |      |                 |             |      |
| ≤280           | 3 | 0.61(0.53-0.69) | 0.0, 0.832   | 0.04 | 0.56(0.47-0.65) | 49.7, 0.137 | 0.61 |
| >280           | 4 | 0.50(0.44-0.56) | 88.8, <0.001 |      | 0.62(0.56-0.68) | 82.3, 0.001 |      |
| Cut-off value  |   |                 |              |      |                 |             |      |
| ≤3.57          | 4 | 0.56(0.48-0.64) | 76.3, 0.006  | 0.40 | 0.58(0.52-0.64) | 75.8, 0.006 | 0.38 |
| >3.57          | 3 | 0.52(0.42-0.62) | 91.2, <0.001 |      | 0.63(0.55-0.72) | 40.0, 0.189 |      |
| Treatment      |   |                 |              |      |                 |             |      |
| Surgery        | 4 | 0.51(0.44-0.58) | 88.2, <0.001 | 0.11 | 0.63(0.57-0.69) | 78.0, 0.003 | 0.53 |
| Mixed          | 3 | 0.59(0.51-0.67) | 0.0, 0.740   |      | 0.56(0.48-0.63) | 49.6, 0.137 |      |
| Pathology      |   |                 |              |      |                 |             |      |
| SCC            | 7 | 0.54(0.48-0.61) | 84.9, <0.001 | NR   | 0.60(0.54-0.65) | 73.5, 0.001 | NR   |
| Mixed          | 0 | NR              | NR           |      | NR              | NR          |      |
| Clinical stage |   |                 |              |      |                 |             |      |
| 0-III          | 7 | 0.54(0.48-0.61) | 84.9, <0.001 | NR   | 0.60(0.54-0.65) | 73.5, 0.001 | NR   |
| 0-IV           | 0 | NR              | NR           |      | NR              | NR          |      |
| Follow-up      |   |                 |              |      |                 |             |      |
| ≤39            | 2 | 0.52(0.41-0.64) | 74.1, 0.050  | 0.93 | 0.59(0.48-0.69) | 38.1, 0.204 | 0.34 |
| >39            | 4 | 0.52(0.48-0.56) | 90.3, <0.001 |      | 0.64(0.59-0.68) | 79.3, 0.002 |      |
| NR             | 1 | NR              | NR           |      | NR              | NR          |      |
| Age            |   |                 |              |      |                 |             |      |
| ≤61.5          | 4 | 0.50(0.44-0.56) | 88.8, <0.001 | 0.68 | 0.62(0.56-0.68) | 82.3, 0.001 | 0.06 |
| >61.5          | 2 | 0.61(0.53-0.67) | 0.0, 0.554   |      | 0.60(0.51-0.70) | 26.0, 0.245 |      |
| NR             | 1 | NR              | NR           |      | NR              | NR          |      |
| Sex ratio      |   |                 |              |      |                 |             |      |

|                       |   |                 |              |      |                 |              |        |
|-----------------------|---|-----------------|--------------|------|-----------------|--------------|--------|
| ≤4.32                 | 4 | 0.50(0.43-0.57) | 87.4, <0.001 | 0.74 | 0.59(0.51-0.66) | 77.3, 0.004  | 0.29   |
| >4.32                 | 3 | 0.59(0.51-0.67) | 0.0, 0.643   |      | 0.60(0.51-0.68) | 78.6, 0.009  |        |
| <b>mGPS</b>           |   |                 |              |      |                 |              |        |
| Overall               | 5 | 0.46(0.30-0.62) | 96.0, <0.001 |      | 0.80(0.72-0.86) | 76.2, 0.002  |        |
| <b>Country</b>        |   |                 |              |      |                 |              |        |
| China                 | 3 | 0.51(0.31-0.71) | 97.8, <0.001 | 0.44 | 0.76(0.65-0.87) | 86.4, 0.001  | 0.01   |
| Non-China             | 2 | 0.39(0.15-0.62) | 68.5, 0.075  |      | 0.84(0.76-0.93) | 42.6, 0.187  |        |
| <b>Sample size</b>    |   |                 |              |      |                 |              |        |
| ≤212                  | 2 | 0.66(0.56-0.76) | 0.0, 0.320   | 0.00 | 0.68(0.57-0.80) | 78.3, 0.032  | 0.43   |
| >212                  | 3 | 0.32(0.24-0.41) | 86.2, 0.001  |      | 0.85(0.82-0.89) | 10.1, 0.329  |        |
| <b>Cut-off value</b>  |   |                 |              |      |                 |              |        |
| 1-2 VS 0              | 4 | 0.42(0.26-0.58) | 95.6, <0.001 | 0.31 | 0.84(0.80-0.89) | 0.0, 0.503   | <0.001 |
| 2 VS 0                | 1 | 0.64(0.34-0.94) | NR           |      | 0.62(0.47-0.77) | NR           |        |
| <b>Treatment</b>      |   |                 |              |      |                 |              |        |
| Surgery               | 3 | 0.32(0.24-0.41) | 86.2, 0.001  | 0.00 | 0.85(0.82-0.89) | 10.1, 0.329  | 0.43   |
| Mixed                 | 2 | 0.66(0.56-0.76) | 0.0, 0.320   |      | 0.68(0.57-0.80) | 78.3, 0.032  |        |
| <b>Pathology</b>      |   |                 |              |      |                 |              |        |
| SCC                   | 4 | 0.50(0.32-0.67) | 96.8, <0.001 | 0.37 | 0.78(0.70-0.86) | 79.6, 0.002  | 0.01   |
| Mixed                 | 1 | 0.33(0.02-0.63) | NR           |      | 0.87(0.78-0.97) | NR           |        |
| <b>Clinical stage</b> |   |                 |              |      |                 |              |        |
| 0-III                 | 4 | 0.42(0.26-0.58) | 95.6, <0.001 | 0.28 | 0.84(0.80-0.89) | 0.0, 0.503   | 0.75   |
| 0-IV                  | 1 | 0.64(0.34-0.94) | NR           |      | 0.62(0.47-0.77) | NR           |        |
| <b>Follow-up</b>      |   |                 |              |      |                 |              |        |
| ≤39                   | 3 | 0.47(0.25-0.68) | 92.3, <0.001 | 0.99 | 0.79(0.71-0.88) | 84.9, 0.001  | 0.15   |
| >39                   | 1 | NR              | NR           |      | NR              | NR           |        |
| NR                    | 1 | NR              | NR           |      | NR              | NR           |        |
| <b>Age</b>            |   |                 |              |      |                 |              |        |
| ≤61.7                 | 3 | 0.51(0.31-0.71) | 97.8, <0.001 | 0.59 | 0.76(0.65-0.87) | 86.4, 0.001  | 0.38   |
| >61.7                 | 2 | 0.39(0.15-0.62) | 68.5, 0.075  |      | 0.84(0.76-0.93) | 42.6, 0.187  |        |
| <b>Sex ratio</b>      |   |                 |              |      |                 |              |        |
| ≤4.91                 | 2 | 0.42(0.17-0.67) | 98.4, <0.001 | 0.67 | 0.77(0.64-0.90) | 93.0, <0.001 | 0.35   |
| >4.91                 | 3 | 0.49(0.28-0.70) | 93.5, <0.001 |      | 0.82(0.73-0.91) | 0.0, 0.376   |        |

Abbreviations: OS, overall survival; CSS, cancer-specific survival; DFS, disease-free survival; EC, esophageal carcinoma; NLR, neutrophil-to-lymphocyte ratio; PLR, platelet-to-lymphocyte ratio; LMR, lymphocyte-to-monocyte ratio; CAR, c-reactive protein-to-albumin ratio; SII, systemic inflammation index; PNI, prognostic nutritional index; GPS, Glasgow Prognostic Score; mGPS, modified Glasgow Prognostic Score; Ref, reference; P-reg, the P-value of meta regression; NR, not reported.
