# Supplementary material
Source: HighWire-hosted journal article supplement (https://bmjopen.bmj.com/content/11/9/e048324)
Supplement: inline-supplementary-material-6 [file inline-supplementary-material-6.pdf]

Table 1. Pair-wise comparisons between modalities for sensitivity, specificity, P-LR, N-LR, DOR and AUC.

| Category    | Sensitivity       | P     | Specificity       | P     | P-LR           | P     | N-LR              | P     | DOR               | P     | AUC                 | P             |
|-------------|-------------------|-------|-------------------|-------|----------------|-------|-------------------|-------|-------------------|-------|---------------------|---------------|
| NLR         | 0.51 [0.47, 0.54] | NA    | 0.70 [0.64, 0.76] | NA    | 1.7 [1.5, 2.0] | NA    | 0.70 [0.66, 0.74] | NA    | 2.42 [1.96, 2.99] | NA    | 0.60 [0.56 - 0.64]  | NA            |
| PLR         | 0.53 [0.47, 0.59] | NA    | 0.65 [0.60, 0.70] | NA    | 1.5 [1.3, 1.8] | NA    | 0.72 [0.64, 0.80] | NA    | 2.12 [1.65, 2.73] | NA    | 0.63 [0.59 - 0.67]  | NA            |
| LMR         | 0.54 [0.48, 0.61] | NA    | 0.60 [0.54, 0.65] | NA    | 1.3 [1.2, 1.6] | NA    | 0.76 [0.67, 0.87] | NA    | 1.76 [1.34, 2.32] | NA    | 0.60 [0.55 - 0.64]  | NA            |
| SII         | 0.61 [0.48, 0.73] | NA    | 0.60 [0.45, 0.73] | NA    | 1.5 [1.2, 1.9] | NA    | 0.65 [0.53, 0.79] | NA    | 2.33 [1.61, 3.36] | NA    | 0.64 [0.60 - 0.68]  | NA            |
| PNI         | 0.51 [0.41, 0.61] | NA    | 0.67 [0.56, 0.77] | NA    | 1.6 [1.3, 1.9] | NA    | 0.73 [0.66, 0.81] | NA    | 2.14 [1.67, 2.73] | NA    | 0.61 [0.57 - 0.66]  | NA            |
| CAR         | 0.50 [0.38, 0.62] | NA    | 0.84 [0.71, 0.91] | NA    | 3.0 [1.7, 5.6] | NA    | 0.60 [0.46, 0.77] | NA    | 4.59 [2.17, 9.72] | NA    | 0.72 [0.68 - 0.75]  | NA            |
| GPS         | 0.48 [0.43, 0.54] | NA    | 0.79 [0.72, 0.85] | NA    | 2.3 [1.8, 3.0] | NA    | 0.65 [0.59, 0.72] | NA    | 3.41 [2.58, 4.51] | NA    | 0.67 [0.63 - 0.71]  | NA            |
| mGPS        | 0.46 [0.30, 0.62] | NA    | 0.80 [0.72, 0.86] | NA    | 2.3 [1.8, 2.9] | NA    | 0.68 [0.53, 0.86] | NA    | 3.18 [2.05, 4.94] | NA    | 0.75 [0.71 - 0.78]  | NA            |
| CAR vs GPS  | 50% vs 48%        | >0.05 | 84% vs 79%        | >0.05 | 3.0 vs 2.3     | >0.05 | 0.60 vs 0.65      | >0.05 | 4.59 vs 3.41      | >0.05 | <b>0.72 vs 0.67</b> | <b>0.0327</b> |
| mGPS vs GPS | 6% vs 44%         | >0.05 | 80% vs 79%        | >0.05 | 2.3 vs 2.3     | >0.05 | 0.68 vs 0.65      | >0.05 | 3.18 vs 3.41      | >0.05 | <b>0.75 vs 0.67</b> | <b>0.0016</b> |
| CAR vs mGPS | 50% vs 46%        | >0.05 | 84% vs 80%        | >0.05 | 3.0 vs 2.3     | >0.05 | 0.60 vs 0.68      | >0.05 | 4.59 vs 3.18      | >0.05 | 0.72 vs 0.75        | >0.05         |

P-DR, The pooled positive likelihood ratio; N-DR, negative likelihood ratio, DOR, diagnostic odds ratio.
