# Supplementary material
Source: HighWire-hosted journal article supplement (https://bmjopen.bmj.com/content/11/9/e048324)
Supplement: inline-supplementary-material-7 [file inline-supplementary-material-7.pdf]

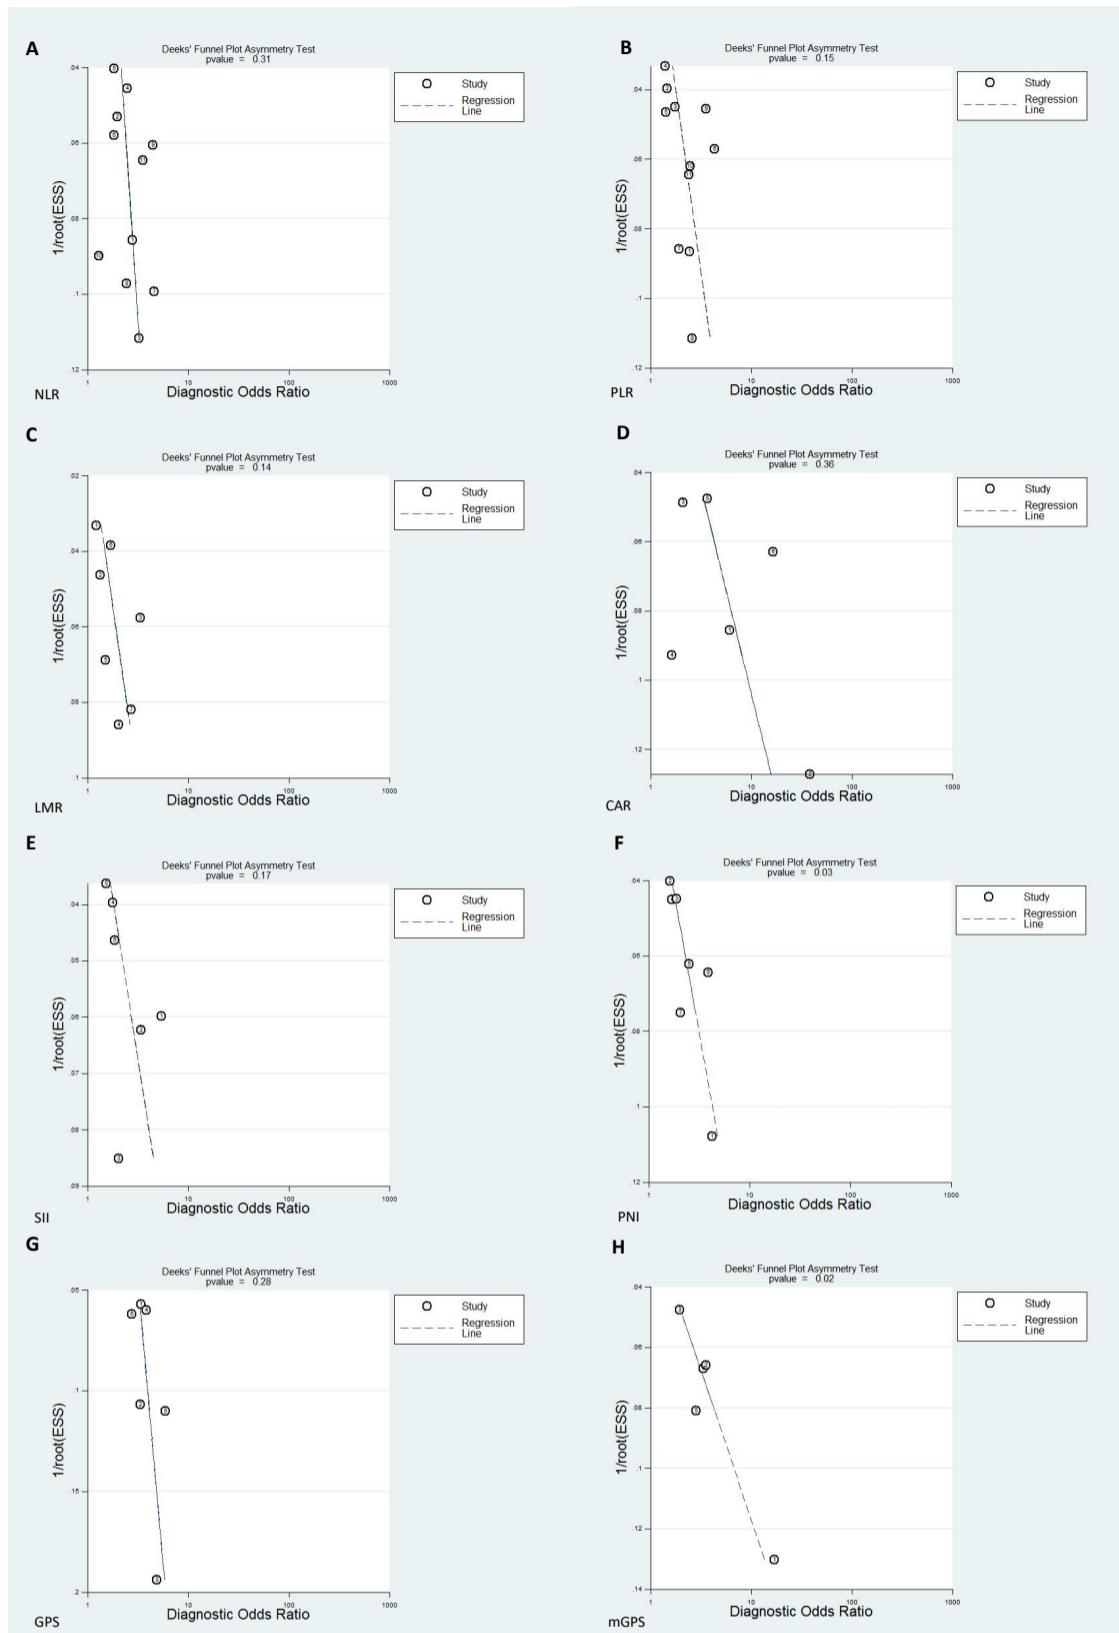

Figure 1. Deek's Funnel evaluating publication bias of DOR of 8 indicators. (A) NLR; (B) PLR; (C) LMR; (D) CAR; (E) SII; (F) PNI; (G) GPS; (H) mGPS.
